1 **Reduced Gene Dosage of Histone H4 Prevents CENP-A Mislocalization in Budding Yeast**

2

3 Jessica R. Eisenstatt\*, Kentaro Ohkuni\*, Olivia Preston\*, Wei-Chun Au\*, Michael Costanzo<sup>†, ‡</sup>,

4 Charles Boone<sup>†, ‡</sup>, and Munira A. Basrai\*

5 \*Genetics Branch, Center for Cancer Research, National Cancer Institute, National Institutes of

6 Health, Bethesda, Maryland 20894, <sup>†</sup>Department of Molecular Genetics, University of Toronto

7 and <sup>‡</sup>Donnelly Centre for Cellular and Biomolecular Research, Toronto, Ontario M5S 3E1,

8 Canada

9

- 10 Running Title (35 characters): H4 Promotes CENP-A Mislocalization
- 11 Keywords (up to 5): Centromere, CENP-A, Histone H4, Psh1
- 12 Corresponding Author: Munira A. Basrai, Genetics Branch, National Cancer Institute, National
- 13 Institutes of Health, 41 Medlars Drive, Rm B624, Bethesda, MD 20892. E-mail:
- 14 basrain@mail.nih.gov Phone: 240-760-6746
- 15

## ABSTRACT

16  
17 Mislocalization of the centromeric histone H3 variant (Cse4 in budding yeast, CID in flies,  
18 CENP-A in humans) contributes to chromosomal instability (CIN) in yeast, fly, and human cells.  
19 Overexpression and mislocalization of CENP-A has been observed in several cancers. However,  
20 the mechanisms that contribute to the mislocalization of CENP-A are not fully understood. In  
21 this study, we used budding yeast to identify genes that facilitate the mislocalization of Cse4 to  
22 non-centromeric regions. Previous studies have shown that E3 ligases (Psh1, Slx5, Cdc4) and  
23 factors such as Doa1, Hir2, and Cdc7 regulate proteolysis of Cse4 and prevent its  
24 mislocalization. Overexpressed Cse4 (*GALCSE4*) is highly stable and causes synthetic dosage  
25 lethality (SDL) in *psh1Δ*, *slx5Δ*, *doa1Δ*, *hir2Δ*, *cdc4-1*, and *cdc7-4* strains. We used a genome-  
26 wide screen to identify suppressors of the *psh1Δ GALCSE4* SDL. Deletions of histone H4 alleles  
27 (*HHF1* or *HHF2*) were among the top suppressors of *psh1Δ GALCSE4* SDL. Here we show that  
28 reduced gene dosage of *H4* prevents mislocalization of Cse4 and promotes faster degradation of  
29 Cse4 in a *psh1Δ GALCSE4* strain. Deletion of either *HHF1* or *HHF2* also suppresses the  
30 *GALCSE4* SDL in *slx5Δ*, *doa1Δ*, *hir2Δ*, *cdc4-1*, and *cdc7-4* strains. Suppression of *psh1Δ*  
31 *GALCSE4* SDL by *hhf1-20*, which is defective for interaction with Cse4, suggests that defects in  
32 the Cse4-H4 interaction prevents mislocalization of Cse4. In summary, our genome-wide screen  
33 identified genes that contribute to Cse4 mislocalization and we show how reduced dosage of  
34 histone H4-encoding genes prevents mislocalization of Cse4 into non-centromeric regions.  
35

36

## INTRODUCTION

37           Centromeres are specialized chromosome loci that are essential for faithful chromosome  
38 segregation during mitosis and meiosis. The kinetochore (centromeric DNA and associated  
39 proteins) provides an attachment site for microtubules for segregation of sister chromatids during  
40 cell division (ALLSHIRE AND KARPEN 2008; VERDAASDONK AND BLOOM 2011; BURRACK AND  
41 BERMAN 2012; CHOY *et al.* 2012; MADDOX *et al.* 2012; MCKINLEY AND CHEESEMAN 2016).  
42 Despite the wide divergence of centromere DNA sequence, establishment of centromeric  
43 chromatin is highly regulated by epigenetic mechanisms where incorporation of the essential and  
44 evolutionarily conserved centromeric histone H3 variant CENP-A (Cse4 in *Saccharomyces*  
45 *cerevisiae*, Cnp1 in *Schizosaccharomyces pombe*, CID in *Drosophila melanogaster*, and CENP-  
46 A in mammals) serves to nucleate kinetochore assembly (KITAGAWA AND HIETER 2001; BIGGINS  
47 2013; MCKINLEY AND CHEESEMAN 2016). Cellular levels of CENP-A are stringently regulated  
48 and overexpression of CENP-A leads to its mislocalization to non-centromeric chromatin and  
49 contributes to aneuploidy in yeast, flies, and humans (COLLINS *et al.* 2004; HEUN *et al.* 2006;  
50 MORENO-MORENO *et al.* 2006; AU *et al.* 2008; MISHRA *et al.* 2011; LACOSTE *et al.* 2014;  
51 ATHWAL *et al.* 2015; SHRESTHA *et al.* 2017). Overexpression and mislocalization of CENP-A is  
52 observed in many cancers and is proposed to promote tumorigenesis (TOMONAGA *et al.* 2003;  
53 AMATO *et al.* 2009; LI *et al.* 2011; MCGOVERN *et al.* 2012; SUN *et al.* 2016). Thus, molecular  
54 mechanisms that promote and prevent mislocalization of CENP-A is an area of active  
55 investigation.

56           In budding yeast, post-translational modifications (PTMs) of Cse4, such as  
57 ubiquitination, sumoylation, and isomerization, are important for regulating steady-state levels of  
58 Cse4 and preventing its mislocalization to non-centromeric regions, thereby maintaining

59 chromosome stability (COLLINS *et al.* 2004; HEWAWASAM *et al.* 2010; RANJITKAR *et al.* 2010;  
60 OHKUNI *et al.* 2014; OHKUNI *et al.* 2016; CHENG *et al.* 2017; AU *et al.* 2020). Ubiquitin-mediated  
61 proteolysis of Cse4 by E3 ubiquitin ligases such as Psh1 (HEWAWASAM *et al.* 2010; RANJITKAR  
62 *et al.* 2010), Slx5 (OHKUNI *et al.* 2016), SCF<sup>Met30/Cdc4</sup> (AU *et al.* 2020), SCF<sup>Rcy1</sup> (CHENG *et al.*  
63 2016), and Ubr1 (CHENG *et al.* 2017) and proline isomerase Fpr3 (OHKUNI *et al.* 2014) regulate  
64 the cellular levels of Cse4. Psh1-mediated proteolysis of Cse4 has been well characterized and  
65 has been shown to be regulated by the FACT (Facilitates Chromatin Transcription/Transactions)  
66 complex (DEYTER AND BIGGINS 2014), CK2 (Casein Kinase 2) (HEWAWASAM *et al.* 2014), HIR  
67 (Histone Regulation) histone chaperone complex (CIFTCI-YILMAZ *et al.* 2018), and DDK (Dbf4-  
68 Dependent Kinase) complex (EISENSTATT *et al.* 2020). In general, mutation or deletion of these  
69 factors that prevent Cse4 mislocalization show synthetic dosage lethality (SDL) when Cse4 is  
70 overexpressed from a galactose-inducible promoter (*GALCSE4*).

71 The evolutionarily conserved CENP-A specific histone chaperones (Scm3 in *S.*  
72 *cerevisiae* and *S. pombe*, CAL1 in *D. melanogaster*, Holliday Junction Recognition Protein  
73 HJURP in humans) mediate the centromeric localization of CENP-A (CAMAHORT *et al.* 2007;  
74 MIZUGUCHI *et al.* 2007; STOLER *et al.* 2007; FOLTZ *et al.* 2009; PIDOUX *et al.* 2009; WILLIAMS *et*  
75 *al.* 2009; SHUAIB *et al.* 2010; CHEN *et al.* 2014). In budding yeast, chaperones other than Scm3  
76 can facilitate the deposition of overexpressed CENP-A when the balance of H3 and CENP-A is  
77 altered. For example, the Chromatin Assembly Factor 1 (CAF-1), an evolutionarily conserved  
78 replication-coupled histone H3/H4 chaperone, promotes localization of overexpressed Cse4 to  
79 centromeres when Scm3 is depleted in *S. cerevisiae* (HEWAWASAM *et al.* 2018). The CAF-1  
80 orthologues Mis16 in *S. pombe* and RbAp46/48 in humans and *D. melanogaster* also contribute  
81 to centromeric localization of CENP-A (FUJITA *et al.* 2007; PIDOUX *et al.* 2009; WILLIAMS *et al.*

82 2009; BOLTENGAGEN *et al.* 2016). In contrast to CENP-A deposition at centromeric regions,  
83 mechanisms that facilitate the mislocalization of CENP-A to non-centromeric regions have not  
84 been fully explored. Studies from our laboratory and those of others show that the transcription-  
85 coupled histone H3/H4 chaperone DAXX/ATRX promotes mislocalization of CENP-A to non-  
86 centromeric regions in human cells (LACOSTE *et al.* 2014; SHRESTHA *et al.* 2017). In budding  
87 yeast, CAF-1 contributes to the mislocalization of Cse4 to non-centromeric regions  
88 (HEWAWASAM *et al.* 2018). We have recently shown that sumoylation of the C-terminus of Cse4  
89 facilitates its interaction with CAF-1 and this promotes the deposition of Cse4 to non-  
90 centromeric regions (OHKUNI *et al.* 2020). Notably, *psh1Δ cac2Δ* with *GALCSE4* and *psh1Δ*  
91 with *GALcse4<sup>K215/216RA</sup>* do not exhibit SDL due to reduced mislocalization of Cse4  
92 (HEWAWASAM *et al.* 2018; OHKUNI *et al.* 2020).

93 Defining the mechanisms that facilitate the mislocalization of Cse4 to non-centromeric  
94 regions is essential for understanding chromosomal instability (CIN). We performed a genome-  
95 wide screen using a synthetic genetic array (SGA) to identify genes that promote Cse4  
96 mislocalization. We took advantage of the SDL of a *psh1Δ GALCSE4* strain (HEWAWASAM *et al.*  
97 2010; RANJITKAR *et al.* 2010; AU *et al.* 2013) to identify suppressors of the SDL phenotype. An  
98 SGA analysis was performed by combining mutants of essential genes and deletion of non-  
99 essential genes with *psh1Δ GALCSE4*. The screen identified mutations or deletions of genes  
100 encoding regulators of chromatin remodeling, RNA transcription/processing, nucleosome  
101 occupancy, ubiquitination, and histone H4. Deletion of the two alleles that encode histone H4  
102 (*HHF1* or *HHF2*) were among the most prominent suppressors of the *psh1Δ GALCSE4* SDL.

103 In this study, we focused on understanding how reduced gene dosage of *H4* suppresses  
104 the SDL of a *psh1Δ GALCSE4* strain. The budding yeast genome possesses two gene pairs which

105 encode identical H3 and H4 proteins (*HHT1/HHF1* and *HHT2/HHF2*) and two gene pairs which  
106 encode identical H2A and H2B proteins (*HTA1/HTB1* and *HTA2/HTB2*). We show that deletion  
107 of either allele of histone H4 (*HHT1/hhf1* $\Delta$  or *HHT2/hhf2* $\Delta$ ), but not histone H3 (*hht1* $\Delta$ /*HHF1* or  
108 *hht2* $\Delta$ /*HHF2*) or histone H2A (*hta1* $\Delta$ /*HTB1* or *hta2* $\Delta$ /*HTB2*), suppresses the SDL phenotype of a  
109 *psh1* $\Delta$  *GALCSE4* strain. We determined that deletion of *HHF1* or *HHF2* suppresses the  
110 mislocalization of Cse4 to non-centromeric regions in a *psh1* $\Delta$  strain and a *hhf2* $\Delta$  *psh1* $\Delta$  strain  
111 displays faster degradation of Cse4. Deletion of *HHF1* or *HHF2* also suppresses the *GALCSE4*  
112 SDL in *slx5* $\Delta$ , *doa1* $\Delta$ , *hir2* $\Delta$ , *cdc4-1*, and *cdc7-4* strains. Moreover, *hhf1-20*, which has mutations  
113 in the H4 histone fold domain and is defective for interaction with Cse4, (SMITH *et al.* 1996;  
114 GLOWCZEWSKI *et al.* 2000) suppresses the *psh1* $\Delta$  *GALCSE4* SDL, suggesting that the Cse4-H4  
115 interaction is required for association of Cse4 with chromatin. In summary, our genome-wide  
116 suppressor screen allowed us to identify genes that contribute to Cse4 mislocalization and to  
117 define a role for the gene dosage of *H4* in facilitating the mislocalization of Cse4 into non-  
118 centromeric regions.

119

120

## MATERIALS AND METHODS

### 121 **Strains and Plasmids**

122 Yeast strains used in this study are described in Table S2 and plasmids in Table S3. Yeast  
123 strains were grown in rich media (1% yeast extract, 2% bacto-peptone, 2% glucose) or synthetic  
124 medium with glucose or raffinose and galactose (2% final concentration each) and supplements  
125 to allow for selection of the indicated plasmids. Double mutant strains were generated by mating  
126 wild type or *psh1Δ* strains with empty vector or a plasmid containing *GALI-6His-3HA-CSE4* to  
127 mutant strains on rich medium at room temperature for six hours followed by selection of diploid  
128 cells on medium selective for the plasmid and appropriate resistance markers. Diploids were  
129 sporulated for 5 days at 23°C and plated on selective medium without uracil, histidine, or  
130 arginine and with canavanine, clonNAT, and G418 to select for MATa double mutants. The  
131 synthetic genetic array (SGA) was performed as previously described (COSTANZO *et al.* 2016).

### 132 **Growth assays**

133 Growth assays were performed as previously described (EISENSTATT *et al.* 2020). Wild  
134 type and mutant strains were grown on medium selective for the plasmid, suspended in water to  
135 a concentration with an optical density of 1 measured at a wavelength of 600 nm (OD<sub>600</sub>,  
136 approximately 1.0 X 10<sup>7</sup> cells per ml), and plated in five-fold serial dilutions starting with 1  
137 OD<sub>600</sub> on synthetic growth medium containing glucose or galactose and raffinose (2% final  
138 concentration each) selecting for the plasmid. Strains were grown at the indicated temperatures  
139 for 3-5 days.

### 140 **Protein stability assays**

141 Protein stability assays were performed as previously described (AU *et al.* 2008). Briefly,  
142 logarithmically growing wild type and mutant cells were grown for four hours in media selective  
143 for the plasmid containing galactose/raffinose (2% final concentration each) at 30°C followed by  
144 addition of cycloheximide (CHX, 10 μg/ml) and glucose (2% final concentration). Protein



145 extracts were prepared from cells collected 0, 30, 60, 90, and 120 minutes after CHX addition  
146 with the TCA method as described previously (KASTENMAYER *et al.* 2006). Equal amount of  
147 protein as determined by the Bio-Rad DC™ Protein Assay were analyzed by Western blot.  
148 Proteins were separated by SDS-PAGE on 4-12% Bis-TRIS SDS-polyacrylamide gels (Novex,  
149 NP0322BOX) and analysis was done against primary antibodies  $\alpha$ -HA (1:1000, Roche, 12CA5)  
150 or  $\alpha$ -Tub2 (1:4500, custom made for Basrai Laboratory) in TBST containing 5% (w/v) dried  
151 skim milk. HRP-conjugated sheep  $\alpha$ -mouse IgG (Amersham Biosciences, NA931V) and HRP-  
152 conjugated donkey  $\alpha$ -rabbit IgG (Amersham Biosciences, NA934V) were used as secondary  
153 antibodies. Stability of the Cse4 protein relative to the Tub2 loading control was measured as the  
154 percent remaining as determined with the Image Lab Software (BioRad).

#### 155 **Ubiquitination Pull-down Assay**

156 Levels of ubiquitinated Cse4 were determined with ubiquitin pull-down assays as  
157 described previously (AU *et al.* 2013) with modifications. Cells were grown to logarithmic  
158 phase, induced in galactose-containing medium for 3 hours at 30°C and pelleted. The cell pellet  
159 was resuspended in lysis buffer (20 mM Na<sub>2</sub>HPO<sub>4</sub>, 20 mM NAH<sub>2</sub>PO<sub>4</sub>, 50 mM NaF, 5 mM tetra-  
160 sodium pyrophosphate, 10 mM beta-glycerolphosphate, 2 mM EDTA, 1 mM DTT, 1% NP-40, 5  
161 mM N-Ethylmaleimide, 1 mM PMSF, and protease inhibitor cocktail (Sigma, catalogue #  
162 P8215)) and equal volume of glass beads (lysing matrix C, MP Biomedicals). Cell lysates were  
163 generated by homogenizing cells with a FastPrep-24 5G homogenizer (MP Biomedicals) and a  
164 fraction of the lysate was aliquoted for input. An equal concentration of lysates from wild type  
165 and mutant strains were incubated with tandem ubiquitin binding entities (Agarose-TUBE1, Life  
166 Sensors, Inc., catalogue # UM401) overnight at 4°C. Proteins bound to the beads were washed  
167 three times with TBS-T at room temperature and eluted in 2 x Laemmli buffer at 100°C for 10  
168 minutes. The eluted protein was resolved on a 4-12% Bis-Tris gel (Novex, NP0322BOX) and  
169 ubiquitinated Cse4 was detected by Western blot using anti-HA antibody (Roche Inc., 12CA5).  
170 Levels of ubiquitinated Cse4 relative to the non-modified Cse4 in the input were quantified using

171 software provided by the Syngene imaging system. The percentage of ubiquitinated Cse4 levels  
172 is set to 100% in the wild type strain.

### 173 **ChIP-qPCR**

174 Chromatin immunoprecipitations were performed with two biological replicates per  
175 strain as previously described (COLE *et al.* 2014; CHEREJI *et al.* 2017; EISENSTATT *et al.* 2020)  
176 with modifications. Logarithmic phase cultures were grown in raffinose/galactose (2% final  
177 concentration each) media for 4 hours and were treated with formaldehyde (1% final  
178 concentration) for 20 minutes at 30°C followed by the addition of 2.5 M glycine for 10 minutes  
179 at 30°C. Cell pellets were washed twice with 1 X PBS and resuspended in 2 mL FA Lysis Buffer  
180 (1 mM EDTA pH8.0, 50 mM HEPES-KOH pH7.5, 140 mM NaCl, 0.1% sodium deoxycholate,  
181 1% Triton X-100) with 1 x protease inhibitors (Sigma) and 1 mM PMSF (final concentration).  
182 The cell suspension was split into four screw top tubes with glass beads (0.4-0.65 mm diameter)  
183 and lysed in a FastPrep-24 5G (MP Biosciences) for 40 seconds three times, allowed to rest on  
184 ice for 5 minutes, and lysed two final times for 40 seconds each. The cell lysate was collected,  
185 and the chromatin pellet was washed in FA Lysis Buffer twice. Each pellet was resuspended in  
186 600 µl of FA Lysis Buffer and combined into one 5 ml tube. The chromatin suspension was  
187 sonicated with a Branson digital sonifer 24 times at 20% amplitude with a repeated 15 seconds  
188 on/off cycle. After 3 minutes of centrifugation (13000 rpm, 4°C), the supernatant was transferred  
189 to another tube. Input sample was removed (5%) and the average size of the DNA was analyzed.  
190 The remaining lysate was incubated with anti-HA-agarose beads (Sigma, A2095) overnight at  
191 4°C. The beads were washed in 1 ml FA, FA-HS (500 mM NaCl), RIPA, and TE buffers for five  
192 minutes on a rotor two times each. The beads were suspended in ChIP Elution Buffer (25 mM  
193 Tris-HCl pH7.6, 100 mM NaCl, 0.5% SDS) and incubated at 65°C overnight. The beads were  
194 treated with proteinase K (0.5 mg/ml) and incubated at 55°C for four hours followed by

195 Phenol/Chloroform extraction and ethanol precipitation. The DNA pellet was resuspended in a  
196 total of 50  $\mu$ l sterile water. Samples were analyzed by quantitative PCR (qPCR) performed with  
197 the 7500 Fast Real Time PCR System with Fast SYBR Green Master Mix (Applied Biosystems).  
198 qPCR conditions used: 95°C for 20 sec; 40 cycles of 95°C for 3 sec, 60° for 30 sec. Primers used  
199 are listed in Table S4.

#### 200 **Data availability**

201 Strains and plasmids are available upon request. Supporting figures S1-S4 are available as JPG  
202 files. Supporting Table S1 is an Excel file that describes mutations that suppress the *psh1 $\Delta$*   
203 *GALCSE4* SDL, the gene systematic name, the gene name, the functional category, growth and  
204 colony scores, and validation information if applicable. File S1 contains Tables S2, S3, and S4  
205 which describe the yeast strains, plasmids, and primers used in this study, respectively.

206

207

## RESULTS

### 208 **A genome-wide screen identified suppressors of the SDL phenotype of a *psh1Δ GALCSE4*** 209 **strain**

210 Identifying pathways that facilitate the deposition of Cse4 to non-centromeric regions  
211 will provide insight into the mechanisms that promote chromosomal instability (CIN). Deletion  
212 of *PSHI*, which regulates ubiquitin-mediated proteolysis of Cse4, results in synthetic dosage  
213 lethality (SDL) when Cse4 is overexpressed (HEWAWASAM *et al.* 2010; RANJITKAR *et al.* 2010).  
214 We reasoned that strains with deletions or mutations of factors that promote Cse4 mislocalization  
215 would rescue the SDL of a *psh1Δ* strain overexpressing Cse4. Therefore, we generated a *psh1Δ*  
216 query strain with *6His-3HA-CSE4* on a galactose-inducible plasmid (*GALCSE4*) and mated it to  
217 arrays of 3,827 non-essential gene deletion strains and of 786 conditional mutant alleles,  
218 encoding 560 essential genes, and 186 non-essential genes for internal controls (COSTANZO *et al.*  
219 2016). Growth of the haploid meiotic progeny plated in quadruplicate was visually scored on  
220 glucose- and galactose-containing media grown at 30°C for non-essential and 26°C for essential  
221 gene mutant strains (Figure 1A). Highlighted in the figure are all four replicates of deletion of  
222 histone H4 (*hpf1Δ*) and Hap3 (*hap3Δ*) showing better growth on galactose media compared to  
223 the control strains along the perimeter and other deletion strains on the plate (Figure 1B, bottom  
224 and top square, respectively). Strains that suppress the *psh1Δ GALCSE4* SDL on galactose-  
225 containing media were given a growth score of one (low suppression) to four (high suppression)  
226 (Table S1). The number of replicates within the quadruplicate that displayed the same growth  
227 were given a colony score of one (one out of four replicates) to four (all four replicates). We  
228 identified ninety-four deletion and mutant alleles encoding ninety-two genes that suppressed the

229 *psh1Δ GALCSE4* SDL and the majority (81%) of quadruplicates had all four colonies displaying  
230 the same level of suppression, indicated by a colony score of four (Table S1).

231 Of the ninety-four alleles, we selected thirty-eight candidate mutants (fourteen non-  
232 essential deletion strains and twenty-four conditional mutants) to confirm the suppression of  
233 *psh1Δ GALCSE4* SDL (Table 1). These candidates displayed a growth score of three or four  
234 where most of the replicates displayed high suppression and represent pathways involved in  
235 RNA processing and cleavage, DNA repair, chromatin remodeling, histone modifications, and  
236 DNA replication (Table 1). Secondary validation of the SDL suppressors was done by  
237 independently generating double mutant strains of *psh1Δ GALCSE4* with candidate mutants.  
238 Growth assays were performed on media selective for the *GALCSE4* plasmid and containing  
239 either glucose or raffinose and galactose. We used a *hir2Δ psh1Δ* strain as a negative control  
240 because *hir2Δ psh1Δ GALCSE4* strains display SDL (CIFTCI-YILMAZ *et al.* 2018). Of the thirty-  
241 eight strains tested, twenty-nine showed almost complete suppression, five strains showed a  
242 partial suppression, and four did not suppress the SDL on galactose media (Tables 1 and S1 and  
243 Figures S1A and S1B). We further tested a subset of the thirty-eight genes to confirm  
244 overexpression of *GALI-6His-3HA-CSE4* and found that strains with mutations in genes  
245 involved in RNA processing and transcription do not show galactose-induced expression of  
246 *GALI-6His-3HA-CSE4* (Table S1 and Figure S1C), indicating that these are false positive hits.  
247 Taken together, secondary validation confirmed that 89% of the candidate mutants tested  
248 suppressed the *psh1Δ GALCSE4* SDL.

249 Our screen identified deletion and mutant alleles corresponding to three components of  
250 the INO80 chromatin remodeling complex, Ies2, Arp8, and Act1 (POCH AND WINSOR 1997;  
251 SHEN *et al.* 2000; SHEN *et al.* 2003; TOSI *et al.* 2013). Secondary validation assays showed that

252 *ies2Δ* and *act1-132* do not suppress the SDL of the *psh1Δ GALCSE4* strain (Figures S1A and  
253 S1B). In contrast, *arp8Δ* did suppress the *psh1Δ GALCSE4* SDL (Figures S1A and S2A)  
254 however, the *arp8Δ* strain displayed polyploidy when analyzed by Fluorescent Activated Cell  
255 Sorting (FACS) (Figure S2B), consequently we did not pursue it further.

#### 256 **Deletion of histone H4 alleles suppresses the SDL of a *psh1Δ GALCSE4* strain**

257 Two nonallelic loci, *HHT1/HHF1* and *HHT2/HHF2*, encode identical H3 and H4  
258 proteins in budding yeast. The screen identified the deletion of either one of the histone H4  
259 alleles, *HHT1/hhf1Δ* (*hhf1Δ*) or *HHT2/hhf2Δ* (*hhf2Δ*), as among the most prominent suppressors  
260 of the *psh1Δ GALCSE4* SDL. A role for the dosage of histone H4-encoding genes in  
261 mislocalization of Cse4 has not yet been reported. We confirmed that the *hhf1Δ* and *hhf2Δ* strains  
262 do not exhibit defects in ploidy or cell cycle by FACS analysis (Figure S3). Growth assays were  
263 done to confirm the suppression of SDL by deleting *HHF1* or *HHF2* in *psh1Δ GALCSE4* strains  
264 and *psh1Δ* strains with empty vector as controls. Our results showed that *psh1Δ hhf1Δ* and *psh1Δ*  
265 *hhf2Δ* strains plated on galactose media rescued the growth defect of the *psh1Δ GALCSE4* strain  
266 (Figure 2A). We determined that the phenotype was linked to deletion of the H4 alleles because  
267 transformation of a plasmid with the respective wild type histone H4 gene into the *psh1Δ hhf1Δ*  
268 or *psh1Δ hhf2Δ* strains restored the SDL observed in the *psh1Δ GALCSE4* strain (Figure 2B).

269 We next sought to investigate if deletion of a single allele for either histone H3 or H2A  
270 genes could suppress the SDL of a *psh1Δ* strain. Note that the two nonallelic loci, *HTA1/HTB1*  
271 and *HTA2/HTB2*, encode almost identical H2A and H2B proteins. Deletion of *HTA1*  
272 (*hta1Δ/HTB1*), *HTA2* (*hta2Δ/HTB2*), *HHT1* (*hht1Δ/HHF1*), or *HHT2* (*hht2Δ/HHF2*) did not  
273 suppress the SDL of a *psh1Δ GALCSE4* strain in growth assays (Figures 2C and 2D and Table

274 2). Based on these results we conclude that the suppression of *psh1Δ GALCSE4* SDL is specific  
275 to the reduced gene dosage of *H4*.

276 **Reduced gene dosage of *H4* suppresses the SDL of *slx5Δ*, *doa1Δ*, *hir2Δ*, *cdc4-1*, and *cdc7-4***  
277 ***GALCSE4* strains**

278 To determine if the SDL suppression by reduced *H4* gene dosage is limited to the *psh1Δ*  
279 *GALCSE4* strain, we deleted *HHF1* or *HHF2* in deletion or mutant strains encoding Slx5, Doa1,  
280 Hir2, Cdc4, and Cdc7 as deletion or mutation of these factors show SDL with *GALCSE4* and  
281 mislocalization of transiently overexpressed Cse4 (AU *et al.* 2013; OHKUNI *et al.* 2016; CIFTCI-  
282 YILMAZ *et al.* 2018; AU *et al.* 2020; EISENSTATT *et al.* 2020). Growth assays revealed that the  
283 SDL of *doa1Δ*, *slx5Δ*, *cdc4-1*, and *cdc7-4 GALCSE4* strains is suppressed when either *HHF1* or  
284 *HHF2* is deleted (Figures 3A and 3B and Table 2), while the SDL of *hir2Δ GALCSE4* is  
285 suppressed only when *HHF2* is deleted (Figure 3A and Table 2). These results suggest that the  
286 gene dosage of *H4* contributes to the SDL of mutants that exhibit defects in Cse4 proteolysis and  
287 mislocalize Cse4 to non-centromeric regions.

288 **Reduced gene dosage of *H4* reduces the mislocalization of Cse4 in *psh1Δ* strains**

289 The SDL phenotype and Cse4 proteolysis defect of *psh1Δ* strains are correlated with the  
290 mislocalization of Cse4 to non-centromeric regions (HEWAWASAM *et al.* 2010; RANJITKAR *et al.*  
291 2010). So, we examined if the suppression of SDL in the *psh1Δ hhf1Δ* or *psh1Δ hhf2Δ GALCSE4*  
292 strains is due to reduced mislocalization of Cse4. We performed ChIP-qPCR to assay the  
293 localization of Cse4 using chromatin from wild type, *psh1Δ*, *hhf1Δ*, *hhf2Δ*, *psh1Δ hhf1Δ*, and  
294 *psh1Δ hhf2Δ* strains transiently overexpressing *GAL1-6His-3HA-CSE4*. In agreement with  
295 previously published data (HILDEBRAND AND BIGGINS 2016; HEWAWASAM *et al.* 2018; OHKUNI  
296 *et al.* 2020), we found that Cse4 enrichment at non-centromeric regions such as *RDS1*, *SLP1*,

297 *GUP2*, and *COQ3* is higher in the *psh1Δ* strain compared to the wild type strain (Figures 4A and  
298 4B and S4A and S4B). In contrast, deletion of *HHF2* (*hhf2Δ*) in a wild type strain or when  
299 combined with *psh1Δ* showed reduced levels of Cse4 enrichment at these regions (Figures 4A  
300 and 4B). Results for ChIP-qPCR with the *hhf1Δ* strain also showed reduced levels of Cse4 at  
301 non-centromeric loci similar to that observed for the *hhf2Δ* strain (Figure S4A and S4B).  
302 Consistent with previous studies (HILDEBRAND AND BIGGINS 2016), we observed higher levels of  
303 Cse4 at peri-centromeric regions in a *psh1Δ* strain (Figures 4C and S4C). However, we observed  
304 reduced levels of Cse4 at peri-centromeric regions in *psh1Δ hhf1Δ* and *psh1Δ hhf2Δ* strains when  
305 compared to the *psh1Δ* strain (Figures 4C and S4C). Localization of Cse4 to the centromere was  
306 not significantly altered in *hhf1Δ*, *hhf2Δ*, *psh1Δ hhf1Δ*, and *psh1Δ hhf2Δ* strains (Figures 4C and  
307 S4C). Based on these results, we conclude that reduced gene dosage of *H4* contributes to reduced  
308 levels of Cse4 at non-centromeric and peri-centromeric regions in *psh1Δ* strains.

309 Scm3 is the primary chaperone for centromeric deposition of Cse4 and strains depleted  
310 for Scm3 are not viable (CAMAHORT *et al.* 2007). However, overexpression of Cse4 can rescue  
311 the growth of Scm3-depleted cells, suggesting that non-Scm3-based mechanisms can promote  
312 centromeric deposition of Cse4 (HEWAWASAM *et al.* 2018). Our studies so far have shown that  
313 reduced gene dosage of *H4* contributes to suppression of Cse4 mislocalization to non-  
314 centromeric regions. We next asked if the reduced gene dosage of *H4* would affect the Scm3-  
315 independent centromeric deposition of Cse4 by assaying the growth of Scm3-depleted cells that  
316 overexpress Cse4. In these strains, expression of Scm3 is regulated by a galactose-inducible  
317 promoter and is only expressed when grown in galactose medium, but not in glucose medium.  
318 However, overexpression of Cse4 from a copper-inducible promoter can suppress the growth  
319 defect caused by depletion of Scm3 on copper-containing medium (HEWAWASAM *et al.* 2018).



320 We constructed strains with deletion of *HHF2* and performed Western blot analysis to confirm  
321 the induced overexpression of Cse4 in these strains when grown in copper-containing medium  
322 (Figure 4D). Growth assays showed that deletion of *HHF2* resulted in poor growth of cells when  
323 Cse4 is overexpressed in Scm3-depleted strains (Figure 4E, glucose + 0.5mM Cu). We conclude  
324 that physiological levels of histone H4 are required for deposition of Cse4 at the centromere in  
325 cells depleted of Scm3 and for mislocalization of Cse4 to peri-centromeric and non-centromeric  
326 regions in *psh1Δ* strains.

### 327 **Deletion of *HHF2* contributes to reduced stability of Cse4 in a *psh1Δ* strain**

328 The SDL phenotype of a *psh1Δ GALCSE4* strain is associated with Cse4 mislocalization  
329 and higher stability of Cse4 (HEWAWASAM *et al.* 2010; RANJITKAR *et al.* 2010). The suppression  
330 of the *psh1Δ GALCSE4* SDL and the reduced mislocalization of Cse4 by *hhf2Δ* prompted us to  
331 examine the effect of *hhf2Δ* on Cse4 stability in wild type and *psh1Δ* strains. Protein stability  
332 assays showed that, in agreement with previous studies (HEWAWASAM *et al.* 2010; RANJITKAR *et*  
333 *al.* 2010), transiently expressed *GAL1-6His-3HA-CSE4* is highly stable in the *psh1Δ* strain when  
334 compared to that observed in a wild type strain. Stability of Cse4 was not significantly affected  
335 in the *hhf2Δ* strain when compared to the wild type strain. We observed reduced stability of Cse4  
336 in the *psh1Δ hhf2Δ* strain compared to the *psh1Δ* strain (Figure 5A). These results show a  
337 correlation between suppression of SDL of *psh1Δ GALCSE4*, reduced mislocalization of Cse4 at  
338 non-centromeric regions, and reduced stability of Cse4 due to reduced gene dosage of *H4*.

339 Since defects in the ubiquitin-proteasome mediated proteolysis of Cse4 contribute to its  
340 increased stability (HEWAWASAM *et al.* 2010; RANJITKAR *et al.* 2010), we investigated if deletion  
341 of *HHF2* affects ubiquitination of Cse4 (Ub<sub>n</sub>-Cse4) in a *psh1Δ* strain. Ubiquitin pull-down assays  
342 were done to determine the levels of Ub<sub>n</sub>-Cse4 in wild type, *psh1Δ*, *hhf2*, and *psh1Δ hhf2Δ*

343 strains transiently overexpressing *GALI-6His-3HA-CSE4*. Wild type strains expressing a non-  
344 tagged Cse4 or a mutant form of Cse4 (*cse4*<sup>16KR</sup>) that cannot be ubiquitinated, where the 16  
345 lysine residues are mutated to arginine, were used as negative controls. As previously reported  
346 (HEWAWASAM *et al.* 2010; RANJITKAR *et al.* 2010), levels of Ub<sub>n</sub>-Cse4 were greatly reduced in  
347 the *psh1Δ* strain (38.2%±12.7) when compared to the wild type strain. The levels of Ub<sub>n</sub>-Cse4 in  
348 the *psh1Δ hhf2Δ* strain (31.7%±12.3) were similar to the *psh1Δ* strain (Figure 5B). Interestingly,  
349 we found that levels of Ub<sub>n</sub>-Cse4 were decreased in the *hhf2Δ* strain (65.3%±23.9) compared to  
350 the levels in the wild type strain (Figure 5B). We propose that reduced mislocalization of Cse4  
351 and ubiquitin-independent proteolysis of Cse4 contribute to reduced stability of Cse4 in a *psh1Δ*  
352 *hhf2Δ GALCSE4* strain.

### 353 **Defects in the Cse4-H4 interaction suppress the *psh1Δ GALCSE4* SDL**

354 Our results so far have shown that reduced gene dosage of *H4* contributes to the reduced  
355 levels of Cse4 at non-centromeric and peri-centromeric regions and suppresses the SDL  
356 phenotype of *psh1Δ GALCSE4* strains. We hypothesized that defects in the interaction of H4  
357 with Cse4 will also result in the suppression of the SDL phenotype of a *psh1Δ GALCSE4* strain.  
358 We used *hhf1* mutants with mutations either in the N-terminal lysines (*hhf1-10*) or in the histone  
359 fold domain (*hhf1-20*) that have been well characterized by genetic and biochemical analysis by  
360 the laboratory of Mitch Smith (SMITH *et al.* 1996; GLOWCZEWSKI *et al.* 2000). Defects in the  
361 formation of the Cse4-H4 dimer in the *hhf1-20* strain, but not the *hhf1-10* strain, are proposed to  
362 contribute to the suppression of the temperature sensitivity of *hhf1-20* but not *hhf1-10* strains by  
363 overexpression of Cse4. We deleted *PSHI* in the same genetic background as the *hhf1-10* and  
364 *hhf1-20* strains and transformed these strains with *GALI-6His-3HA-CSE4* on a plasmid. Growth  
365 assays were performed in strains expressing *GALI-6His-3HA-CSE4* in the presence of only one

366 histone *H3/H4* gene copy as either *HHT1/HHF1* (wild type), *HHT1/hhf1-10*, or *HHT1/hhf1-20*.  
367 Compared to wild type strains with a single copy of genes encoding histones H3/H4,  
368 *HHT1/HHF1 psh1Δ* strains display SDL when Cse4 is overexpressed, albeit at a less prominent  
369 defect than that in the *psh1Δ* strain with two copies of the genes encoding H3/H4 (compare  
370 Figure 6 to Figure 2A, *psh1Δ GALCSE4*). The relative decrease in SDL may be due to the  
371 expression of a single copy of the genes encoding histones H3/H4 in the strain background. Our  
372 results show that the *hhf1-20* mutant suppresses the SDL of *psh1Δ GALCSE4* strains while the  
373 *hhf1-10* mutant does not (Figure 6). These findings suggest that the defect in the interaction of  
374 mutant H4 with Cse4 contributes to the suppression of the *psh1Δ GALCSE4* SDL in the *hhf1-20*  
375 strain.  
376

377

## DISCUSSION

378 Mislocalization of CENP-A and its homologs contributes to CIN in yeast, fly, and human  
379 cells (HEUN *et al.* 2006; AU *et al.* 2008; MISHRA *et al.* 2011; LACOSTE *et al.* 2014; ATHWAL *et al.*  
380 2015; SHRESTHA *et al.* 2017) and overexpression and mislocalization of CENP-A is observed in  
381 many cancers (TOMONAGA *et al.* 2003; AMATO *et al.* 2009; LI *et al.* 2011; MCGOVERN *et al.*  
382 2012; SUN *et al.* 2016; ZHANG *et al.* 2016). In this study, we performed the first genome-wide  
383 screen to identify deletion or temperature sensitive (*ts*) mutants that facilitate the mislocalization  
384 of Cse4 to non-centromeric regions. Deletion of either allele that encodes histone H4, *HHF1* and  
385 *HHF2*, were among the most prominent suppressors of *psh1Δ GALCSE4* SDL and we defined a  
386 role for gene dosage of histone H4 encoding genes in mislocalization of Cse4. The suppression  
387 of SDL is specific to deletion of genes encoding H4 as deletion of either copy of genes encoding  
388 histones H2A or H3 does not suppress the *psh1Δ GALCSE4* SDL. Deletion of *HHF1* or *HHF2*  
389 also suppresses the *GALCSE4* SDL of *slx5Δ*, *doa1Δ*, *hir2Δ*, *cdc4-1*, and *cdc7-4* strains. We  
390 hypothesize that reduced gene dosage of *H4* contributes to reduced mislocalization of Cse4 at  
391 peri-centromeric and non-centromeric regions, which in turn results in faster degradation of Cse4  
392 not incorporated into chromatin and suppression of *psh1Δ GALCSE4* SDL. Based on the known  
393 defect in Cse4-H4 interaction in the *hhf1-20* strain and the suppression of *psh1Δ GALCSE4* SDL  
394 by *hhf1-20*, we propose that defects in the interaction of Cse4 with H4 reduce the association of  
395 Cse4 with chromatin. In summary, our genome-wide screen identified genes that contribute to  
396 Cse4 mislocalization and provided mechanistic insights into how reduced gene dosage of *H4*  
397 prevents mislocalization of Cse4 into non-centromeric regions.

398 The suppressor screen was performed under a condition with high levels of Cse4  
399 overexpression induced from a *GALI-6His-3HA-CSE4* plasmid, which contributes to mild

400 growth sensitivity even in wild type cells and this is further enhanced in *psh1Δ* strains (Figure 2).  
401 To reduce the number of false positives suppressors, we performed the screen with a *psh1Δ*  
402 *GALI-6His-3HA-CSE4* strain grown on 2% galactose medium to achieve maximum levels of  
403 Cse4 overexpression. These growth conditions limited us from identifying partial suppressors  
404 such as deletion of *NHP10*, which encodes a subunit of the INO80 chromatin remodeling  
405 complex and was previously shown to suppress the *psh1Δ GALCSE4* SDL on medium with a  
406 lower concentration of galactose (0.1%) (HILDEBRAND AND BIGGINS 2016). While our screen did  
407 not identify *nhp10Δ*, it did identify two deletions and one mutant allele for genes which encode  
408 INO80 subunits and are evolutionarily conserved between yeast and human cells, Act1, Ies2, and  
409 Arp8 (POCH AND WINSOR 1997; SHEN *et al.* 2000; SHEN *et al.* 2003; TOSI *et al.* 2013). Secondary  
410 growth validation showed that *arp8Δ*, but not *act1-132* or *ies2Δ*, suppresses the *psh1Δ GALCSE4*  
411 SDL. The polyploid nature of the *arp8Δ* strain used in the screen precluded further study with  
412 this suppressor. The stringent growth conditions of the screen also prevented the identification of  
413 deletion of *Cac2*, a subunit of the CAF-1 complex, which promotes Cse4 incorporation at non-  
414 centromeric regions (HEWAWASAM *et al.* 2018). We determined that *cac2Δ* cannot suppress the  
415 *psh1Δ GALI-6HIS-3HA-CSE4* SDL under the conditions used in our screen (data not shown).

416 The identification of both *hhf1Δ* and *hhf2Δ* as suppressors of *psh1Δ GALCSE4* SDL led  
417 us to examine how reduced gene dosage of *H4* contributes to the association of Cse4 with  
418 chromatin. A role for histone H4 in centromeric localization of Cse4 has been reported  
419 previously (DEYTER *et al.* 2017) however, a role for reduced gene dosage of *H4* in non-  
420 centromeric chromosome localization of Cse4 has not yet been reported. Previous studies have  
421 shown that mislocalization of Cse4 to non-centromeric regions contributes to the *GALCSE4* SDL  
422 in *psh1Δ*, *slx5Δ*, *doa1Δ*, *hir2Δ*, *cdc4-1*, and *cdc7-4* strains (HEWAWASAM *et al.* 2010; RANJITKAR

423 *et al.* 2010; AU *et al.* 2013; OHKUNI *et al.* 2016; CIFTCI-YILMAZ *et al.* 2018; AU *et al.* 2020;  
424 EISENSTATT *et al.* 2020). We determined that suppression of the *GALCSE4* SDL phenotype by  
425 *hhf1* $\Delta$  and *hhf2* $\Delta$  is not restricted to *psh1* $\Delta$  strains and is also observed in *slx5* $\Delta$ , *doa1* $\Delta$ , *hir2* $\Delta$ ,  
426 *cdc4-1*, and *cdc7-4* strains. Genome-wide studies have shown that overexpressed Cse4 is  
427 significantly enriched at promoters and peri-centromeric regions in a *psh1* $\Delta$  strain (HILDEBRAND  
428 AND BIGGINS 2016). Our ChIP-qPCR data showed reduced levels of Cse4 at peri-centromeric  
429 and non-centromeric regions in *psh1* $\Delta$  *hhf1* $\Delta$  and *psh1* $\Delta$  *hhf2* $\Delta$  strains when compared to the  
430 *psh1* $\Delta$  strain.

431 The mislocalization of overexpressed Cse4 to non-centromeric regions contributes to  
432 highly stable Cse4 in *psh1* $\Delta$ , *slx5* $\Delta$ , *doa1* $\Delta$ , *hir2* $\Delta$ , *cdc4-1*, and *cdc7-4* strains (HEWAWASAM *et*  
433 *al.* 2010; RANJITKAR *et al.* 2010; AU *et al.* 2013; OHKUNI *et al.* 2016; CIFTCI-YILMAZ *et al.* 2018;  
434 AU *et al.* 2020; EISENSTATT *et al.* 2020). We reasoned that reduced mislocalization of Cse4 to  
435 non-centromeric regions in *psh1* $\Delta$  *hhf2* $\Delta$  strains may contribute to faster degradation of Cse4 in  
436 these strains. Our results showed that the proteolysis of Cse4 was indeed faster in *psh1* $\Delta$  *hhf2* $\Delta$   
437 strains when compared to *psh1* $\Delta$  strain. Intriguingly, this was not due to increased ubiquitination  
438 of Cse4 (Ub<sub>n</sub>-Cse4) in *psh1* $\Delta$  *hhf2* $\Delta$  strains. These results suggest a ubiquitin-independent  
439 mechanism for proteolysis of Cse4 in *hhf2* $\Delta$  *psh1* $\Delta$  strains. Ubiquitin-independent proteolysis has  
440 also been reported previously as *cse4*<sup>16KR</sup>, in which all lysine residues are mutated to arginine, is  
441 not completely stabilized (COLLINS *et al.* 2004).

442 The suppression of SDL is specific to deletion of genes encoding histone H4 as deletion  
443 of genes encoding H2A or H3 do not suppress the *psh1* $\Delta$  *GALCSE4* SDL. These results suggest  
444 that interaction of H4 with Cse4 is the determining factor for association of Cse4 with chromatin.  
445 To test this hypothesis, we used the *hhf1-20* mutant strain in which the formation of the Cse4-H4

446 dimer is impaired and the *hhf1-10* mutant, which does not show this defect (SMITH *et al.* 1996;  
447 GLOWCZEWSKI *et al.* 2000). The *hhf1* mutant strains lack the *HHT2/HHF2* allele and express  
448 only a single copy of *H3/H4*, which is either wild type (*HHT1/HHF1*), *hhf1-10* (*HHT1/hhf1-10*),  
449 or *hhf1-20* (*HHT1/hhf1-20*). In this strain background, the *psh1Δ GALCSE4* SDL was less severe  
450 compared to results in our strains with wild type copies of both *HHT1/HHF1* and *HHT2/HHF2*  
451 (Figure 2). Despite this, we were able to distinguish a suppression of the growth defect in the  
452 *hhf1-20 psh1Δ GALCSE4* strain and conclude that *hhf1-20*, but not *hhf1-10*, suppresses the  
453 *psh1Δ GALCSE4* SDL. Interestingly, the *hhf1-10 psh1Δ GALCSE4* strain displayed more  
454 lethality. The N-terminal lysine residues on histone H4 are acetylated and the *hhf1-10* mutations  
455 mimic the acetylated state of the lysine residues (K to Q). We propose that hyperacetylation of  
456 histone H4 may promote higher mislocalization of Cse4 and a more severe *hhf1-10 psh1Δ*  
457 *GALCSE4* SDL. A recent study showed that mutation of histone H4 (H4R36A) contributes to  
458 defects in ubiquitin-mediated proteolysis and mislocalization of Cse4 to non-centromeric regions  
459 (DEYTER *et al.* 2017). Based on our results, we predict that while the H4R36A mutant  
460 contributes to the Cse4-Psh1 interaction, it will not be defective for interaction with Cse4. Taken  
461 together, our results show that defects in the interaction of H4 with Cse4 contributes to  
462 suppression of the SDL in *hhf1-20 psh1Δ GALCSE4* strain. It will be of interest to perform  
463 reciprocal studies with *cse4* mutants with or without defects in the interaction with H4 to confirm  
464 that Cse4-H4 facilitates the incorporation of Cse4 into chromatin.

465 In summary, our genome-wide screen has identified suppressors of *psh1Δ GALCSE4*  
466 SDL with deletions of either allele that encodes histone H4 (*HHF1* and *HHF2*) as among the  
467 most prominent suppressors. We present several experimental evidences to support our  
468 conclusion that reduced gene dosage of *H4* contributes to reduced mislocalization of Cse4 at

469 peri-centromeric and non-centromeric regions, which in turn results in faster degradation of Cse4  
470 and suppression of the *psh1Δ GALCSE4* SDL. The suppression of SDL by *hhf1Δ* and *hhf2Δ* is  
471 not limited to *psh1Δ GALCSE4* but is also observed in other mutants that exhibit *GALCSE4*  
472 SDL. Most importantly, our results with the *hhf1-20* mutant, which is defective in interaction  
473 with Cse4, showed that the Cse4-H4 interaction is essential not only for centromeric association  
474 of Cse4, but also for non-centromeric localization of Cse4. Future studies will allow us to  
475 understand how defects in the interaction of Cse4 with H4 contribute to suppression of Cse4  
476 mislocalization and the role of other suppressors identified in the screen. These studies are  
477 important from a clinical standpoint given the poor prognosis of CENP-A overexpressing  
478 cancers (TOMONAGA *et al.* 2003; AMATO *et al.* 2009; LI *et al.* 2011; MCGOVERN *et al.* 2012; SUN  
479 *et al.* 2016; ZHANG *et al.* 2016).

480



481 **ACKNOWLEDGEMENTS**

482 We gratefully acknowledge Jennifer Gerton and Mitch Smith for reagents, Kathy McKinnon of

483 the National Cancer Institute Vaccine Branch FACS Core for assistance with FACS analysis,

484 Anthony Dawson for strain construction, and the members of the Basrai laboratory for helpful

485 discussions and comments on the manuscript. MAB is supported by the NIH Intramural

486 Research Program at the National Cancer Institute. This research was also supported by grants

487 from the National Institutes of Health to CB and MC (R01HG005853) and from the Canadian

488 Institute of Health Research to CB (FDN-143264). CB is a fellow in the Canadian Institute for

489 Advanced Research (CIFAR, <https://www.cifar.ca/>) Fungal Kingdom: Threats and

490 Opportunities. The funders had no role in study design, data collection and analysis, decision to

491 publish, or preparation of the manuscript.

492

493 **FIGURE LEGENDS**  
494 **Figure 1. A genome-wide screen identified suppressors of the *psh1Δ GALCSE4* SDL. A.**

495 **Schematic for the genome-wide screen.** A *psh1Δ* strain (YMB10478) transformed with *GAL1-*  
496 *6His-3HA-CSE4* (pMB1458) was mated to an array of non-essential gene deletions and an array  
497 of conditional alleles of essential genes. Growth of the haploid meiotic progeny plated in  
498 quadruplicate was visually scored on glucose-and galactose-containing media grown at 30°C for  
499 non-essential and 26°C for essential gene mutant strains. Ninety-two genes were identified as  
500 growing better on galactose-containing media than the *psh1Δ GALCSE4* strain. Thirty-eight  
501 candidate genes were selected for confirmation of suppression of lethality. **B. Representative**  
502 **plates from the genome-wide screen.** Shown is Plate 01 of the non-essential gene deletion  
503 array. The mutant strains were spotted in quadruplicate on selective media plates containing  
504 glucose (top) or galactose (bottom). Red boxes (top box is *hap3Δ*; bottom box is *hhf1Δ*) highlight  
505 mutant strains that displayed improved growth on galactose-containing plates compared to the  
506 *psh1Δ GALCSE4* control strain (perimeter of plate) and did not show a growth defect or  
507 improved growth on the glucose plates.

508  
509 **Figure 2. Deletion of *H4* genes suppresses the *psh1Δ GALCSE4* SDL.** Three independent  
510 isolates for each strain were assayed and shown is a representative for each. **A. The *psh1Δ***  
511 ***GALCSE4* SDL is suppressed by deletion of *HHF1* or *HHF2*.** Growth assays of wild type,  
512 *psh1Δ*, *hhf1Δ*, *hhf2Δ*, *psh1Δ hhf1Δ*, and *psh1Δ hhf2Δ* strains with empty vector (pMB433;  
513 YMB9802, YMB10478, YMB10825, YMB11166, YMB10821, and YMB10823 respectively) or  
514 *GAL1-6His-3HA-CSE4* (pMB1458; YMB9803, YMB10479, YMB10937, YMB10938,  
515 YMB10822, and YMB10824 respectively). Cells were spotted in five-fold serial dilutions on  
516 glucose (2% final concentration) or raffinose/galactose (2% final concentration each) media

517 selective for the plasmid and grown at 30°C for three to five days. **B. The *psh1Δ GALCSE4***  
518 **SDL suppression is linked to the *hhf1Δ* and *hhf2Δ* alleles.** Growth assays of *psh1Δ hhf1Δ*  
519 (*YMB10822*) and *psh1Δ hhf2Δ* (*YMB10824*) strains with *GALI-6His-3HA-CSE4* (pMB1458)  
520 transformed with empty vector (pRS425) or a plasmid containing wild type *HHF1* (pMB1928)  
521 or *HHF2* (pMB1929). Strains were assayed as described above in (A). **C. and D. Deletion of**  
522 **genes encoding histones H2A (C) or H3 (D) does not suppress the SDL of a *psh1Δ***  
523 ***GALCSE4* strain.** Growth assays of wild type, *psh1Δ*, (E) *hta1Δ*, *hta2Δ*, *psh1Δ hta1Δ*, *psh1Δ*  
524 *hta2Δ*, (F) *hht1Δ*, *hht2Δ*, *psh1Δ hht1Δ*, and *psh1Δ hht2Δ* strains with empty vector (pMB433;  
525 *YMB9802*, *YMB10478*, *YMB11258*, *YMB11266*, *YMB11260*, *YMB11268*, *YMB11274*,  
526 *YMB11282*, *YMB11276*, and *YMB11284* respectively) or *GALI-6His-3HA-CSE4* (pMB1458:  
527 *YMB9803*, *YMB10479*, *YMB11262*, *YMB11270*, *YMB11264*, *YMB11272*, *YMB11278*,  
528 *YMB11286*, *YMB11280*, and *YMB11288* respectively). Strains were assayed as described  
529 above in (A).

530  
531 **Figure 3. Deletion of *HHF1* or *HHF2* suppresses the SDL of mutant strains that exhibit**  
532 ***GALCSE4*-induced SDL and Cse4 mislocalization.** Three independent isolates of each strain  
533 were assayed and shown is a representative for each. **A. Reduced gene dosage of *H4***  
534 **suppresses the SDL of *slx5Δ*, *doa1Δ*, and *hir2Δ GALCSE4* strains.** Growth assays of wild  
535 type (*YMB9804*), *hhf1Δ* (*YMB10937*), *hhf2Δ* (*YMB10938*), *slx5Δ* (*YMB10963*), *slx5Δ hhf1Δ*  
536 (*YMB11046*), *slx5Δ hhf2Δ* (*YMB11047*), *doa1Δ* (*YMB11032*), *doa1Δ hhf1Δ* (*YMB11050*),  
537 *doa1Δ hhf2Δ* (*YMB11053*), *hir2Δ* (*YMB8332*), *hir2Δ hhf1Δ* (*YMB11105*), *hir2Δ hhf2Δ*  
538 (*YMB11107*) strains expressing *GALI-6HIS-3HA-CSE4* (pMB1458). Cells were spotted in five-  
539 fold serial dilutions on glucose (2% final concentration) or raffinose/galactose (2% final

540 concentration each) media selective for the plasmid and grown at 30°C for three to five days. **B.**

541 **Deletion of *HHF1* or *HHF2* suppresses the SDL of *cdc4-1* and *cdc7-4 GALCSE4* strains.**

542 Growth assays of wild type (YMB9804), *hhf1Δ* (YMB10937), *hhf2Δ* (YMB10938), *cdc4-1*

543 (YMB9756), *cdc4-1 hhf1Δ* (YMB11051), *cdc4-1 hhf2Δ* (YMB11054), *cdc7-4* (YMB9760),

544 *cdc7-4 hhf1Δ* (YMB11052), and *cdc7-4 hhf2Δ* (YMB11055) with *GAL1-6His-3HA-CSE4*

545 (pMB1458). Strains were assayed as described above in (A) and grown at 23°C.

546

547 **Figure 4. Deletion of *HHF2* reduces enrichment of Cse4 at peri-centromeric and non-**

548 **centromeric regions.** (A-C) ChIP-qPCR was performed on chromatin lysate from wild type

549 (YMB9804), *psh1Δ* (YMB10479), *hhf2Δ* (YMB10938), and *psh1Δ hhf2Δ* (YMB10824) strains

550 transiently expressing *GAL1-6His-3HA-CSE4* (pMB1458). Enrichment of 6His-3HA-Cse4 is

551 shown as a fold over wild type. Displayed are the mean of two independent experiments. Error

552 bars represent standard deviation of the mean. \*\**p*-value<0.0099, \**p*-value<0.09, ns=not

553 significant. **A. and B. Levels of Cse4 enrichment at non-centromeric regions are reduced in**

554 **a *hhf2Δ* strain.** Enrichment of 6His-3HA-Cse4 at (A) *RDS1*, *SLP1*, *COQ3*, *GUP2*, and (B)

555 *ACT1*, *SAP1*, *PHO5*, *FIG4*, and *UGA3*. **C. Levels of Cse4 at peri-centromeric regions, but not**

556 **at the core centromere, are significantly reduced when *HHF2* is deleted.** Top: A diagram of

557 the peri-centromere and centromere of Chromosome III analyzed by ChIP-qPCR. Horizontal

558 lines represent the regions amplified. Bottom: Enrichment of 6His-3HA-Cse4 at the core

559 centromere and at the left and right peri-centromeric regions on Chromosome III. **D. Cse4 is**

560 **expressed from a copper-inducible promoter in *hhf2Δ* strains depleted of Scm3.** Strains

561 from (D) were grown to logarithmic phase in liquid media selective for the plasmid. Cells were

562 induced with 0.5 mM copper for 2 hours and protein lysates were collected and analyzed by

563 Western blot against Cse4 and Tub2 as a loading control. E: empty vector; C: copper inducible  
564 Cse4; -: no copper; +: 0.5 mM copper. **E. Deletion of *HHF2* reduces Cse4 deposition at the**  
565 **centromere in cells depleted of Scm3.** Growth assays of strains in which Scm3 is expressed  
566 from a galactose inducible promoter and Cse4 expressed from a copper-inducible promoter. Wild  
567 type and *hhf2Δ* with empty vector (pSB17; JG1589 and YMB11252 respectively) or a plasmid  
568 with copper inducible Cse4 (pSB873; JG1690 and YMB11254 respectively) were plated in five-  
569 fold serial dilutions on media plates selective for the plasmid with raffinose/galactose (2% final  
570 concentration each) or glucose (2 % final concentration) and with or without copper (0.5 mM  
571 final concentration). Plates were grown for three to five days at 30°C. Two independent  
572 transformants were tested and a representative image is shown.

573  
574 **Figure 5. Deletion of *HHF2* contributes to reduced stability and ubiquitin-independent**  
575 **proteolysis of Cse4 in a *psh1Δ* strain. A. *hhf2Δ* strains contribute to reduced stability of**  
576 **Cse4 in a *psh1Δ* strain.** Western blot analysis of protein extracts from wild type (YMB9804),  
577 *psh1Δ* (YMB10479), *hhf2Δ* (YMB10938), and *psh1Δ hhf2Δ* (YMB10824) strains transiently  
578 expressing *GALI-6His-3HA-CSE4* (pMB1458). Cells were grown to logarithmic phase in media  
579 selective for the plasmid and containing raffinose (2% final concentration) and induced with  
580 galactose (2% final concentration) for 4 hours. Cultures were treated with cycloheximide (CHX,  
581 10 μg/mL) and analyzed at the indicated time points. Extracts were analyzed by Western blot  
582 against HA (Cse4) and Tub2 as a loading control. Levels of 6His-3HA-Cse4 were normalized to  
583 Tub2 and the quantification of the percent remaining 6His-3HA-Cse4 after CHX treatment is  
584 shown in the graph. Error bars represent the SEM of two independent experiments. **B. Deletion**  
585 **of *HHF2* does not increase ubiquitination of Cse4 in a *psh1Δ* strain.** Ubiquitin-pull down

586 assays were performed using protein extracts from wild type strains (BY4741) with no tag  
587 (pMB433) or expressing *cse4*<sup>16KR</sup> (pMB1892) and from wild type (YMB9804), *psh1Δ*  
588 (YMB10479), *hhf2Δ* (YMB10938), and *psh1Δ hhf2Δ* (YMB10824) strains expressing *GALI-*  
589 *6His-3HA-CSE4* (pMB1458). Lysates were incubated with Tandem Ubiquitin Binding Entity  
590 beads (LifeSensors) prior to analysis of ubiquitin-enriched samples by Western blot against HA  
591 and input samples against HA and Tub2 as a loading control. Poly-ubiquitinated Cse4 (Ub<sub>n</sub>-  
592 Cse4) is indicated by the bracket. HA levels in input samples were normalized to Tub2 levels  
593 and quantification of levels of Ub<sub>n</sub>-Cse4 were normalized to the levels of Cse4 in the input. The  
594 percentage of Ub<sub>n</sub>-Cse4 from two independent experiments with standard error is shown.

595

596 **Figure 6: Mutations in the histone fold domain of histone H4 suppress the SDL phenotype**  
597 **of a *psh1Δ GALCSE4* strain.** Growth assays of wild type (MSY559), *psh1Δ* (YMB11346),  
598 *hhf1-10* (MSY535), *hhf1-20* (MSY534), *psh1Δ hhf1-10* (YMB11347), and *psh1Δ hhf1-20*  
599 (YMB11348) with empty vector (pMB433) or expressing *GALI-6His-3HA-CSE4* (pMB1458).  
600 Cells were plated in five-fold serial dilutions on selective media plates containing either glucose  
601 (2% final concentration) or raffinose/galactose (2% final concentration each). Plates were  
602 incubated at 30°C for three to five days. Three independent transformants were tested and a  
603 representative image is shown.

604

605

## TABLES

606 **TABLE 1.** Candidate double mutant strains with the indicated mutant allele combined with  
 607 *psh1Δ GALCSE4* were generated and used for secondary validation using growth assays.  
 608 Indicated is the allele analyzed, systematic name, gene name, standard name, visual scoring from  
 609 the primary screen for growth score (from one to four) and colony score (from one to four), and  
 610 suppression of SDL (Y: SDL was suppressed; N: SDL was not suppressed; Partial: SDL was  
 611 partially suppressed).

| Allele               | Systematic Name | Gene Name    | Standard Name                              | Growth Score | Colony Score | SDL Suppression |
|----------------------|-----------------|--------------|--------------------------------------------|--------------|--------------|-----------------|
| <b>Non-essential</b> |                 |              |                                            |              |              |                 |
| <i>hhf1Δ</i>         | YBR009C         | <i>HHF1</i>  | Histone H4                                 | 3            | 4            | Y               |
| <i>hhf2Δ</i>         | YNL030W         | <i>HHF2</i>  | Histone H4                                 | 3            | 4            | Y               |
| <i>ies2Δ</i>         | YNL215W         | <i>IES2</i>  | Ino Eighty Subunit                         | 2            | 3            | N               |
| <i>arp8Δ</i>         | YOR141C         | <i>ARP8</i>  | Actin-Related Protein                      | 3            | 4            | Y               |
| <i>swc5Δ</i>         | YBR231C         | <i>SWC5</i>  | SWr Complex                                | 1            | 4            | N               |
| <i>eaf1Δ</i>         | YDR359C         | <i>EAF1</i>  | Esa1p-Associated Factor                    | 2            | 3            | Partial         |
| <i>eap1Δ</i>         | YKL204W         | <i>EAP1</i>  | EIF4E-Associated Protein                   | 2            | 4            | Y               |
| <i>cse2Δ</i>         | YNR010W         | <i>CSE2</i>  | Chromosome SEgregation                     | 2            | 3            | Partial         |
| <i>cse2Δ_tsa</i>     | YNR010W         | <i>CSE2</i>  | Chromosome SEgregation                     | 3            | 3            | Y               |
| <i>mrm2Δ</i>         | YGL136C         | <i>MRM2</i>  | Mitochondrial rRNA Methyl transferase      | 2            | 3            | N               |
| <i>hap3Δ</i>         | YBL021C         | <i>HAP3</i>  | Heme Activator Protein                     | 3            | 4            | Partial         |
| <i>hap5Δ</i>         | YOR358W         | <i>HAP5</i>  | Heme Activator Protein                     | 3            | 4            | Y               |
| <i>rpl6bΔ</i>        | YLR448W         | <i>RPL6B</i> | Ribosomal Protein of the Large subunit     | 2            | 3            | Y               |
| <i>rad4Δ</i>         | YER162C         | <i>RAD4</i>  | RADIation sensitive                        | 2            | 3            | Partial         |
| <i>rad14Δ</i>        | YMR201C         | <i>RAD14</i> | RADIation sensitive                        | 2            | 2            | Y               |
| <b>Essential</b>     |                 |              |                                            |              |              |                 |
| <i>act1-132</i>      | YFL039C         | <i>ACT1</i>  | ACTin                                      | 3            | 4            | N               |
| <i>mob1-5001</i>     | YIL106W         | <i>MOB1</i>  | Mps One Binder                             | 4            | 4            | Y               |
| <i>tbf1-5001</i>     | YPL128C         | <i>TBF1</i>  | TTAGGG repeat-Binding Factor               | 3            | 4            | Y               |
| <i>csl4-5001</i>     | YNL232W         | <i>CSL4</i>  | Cep1 Synthetic Lethal                      | 4            | 4            | Y               |
| <i>pop4-5001</i>     | YBR257W         | <i>POP4</i>  | Processing Of Precursor RNAs               | 4            | 4            | Y               |
| <i>orc1-5001</i>     | YML065W         | <i>ORC1</i>  | Origin Recognition Complex                 | 4            | 4            | Y               |
| <i>orc6-5001</i>     | YHR118C         | <i>ORC6</i>  | Origin Recognition Complex                 | 4            | 4            | Y               |
| <i>cft2-1</i>        | YLR115W         | <i>CFT2</i>  | Cleavage Factor Two                        | 3            | 4            | Partial         |
| <i>cft2-5001</i>     | YLR115W         | <i>CFT2</i>  | Cleavage Factor Two                        | 4            | 4            | Y               |
| <i>clp1-5001</i>     | YOR250C         | <i>CLP1</i>  | CLeavage/Polyadenylation factor Ia subunit | 4            | 3            | Y               |
| <i>ipa1-5001</i>     | YJR141W         | <i>IPA1</i>  | Important for cleavage and PolyAdenylation | 3            | 4            | Y               |
| <i>hrp1-1</i>        | YOL123W         | <i>HRP1</i>  | Heterogenous nuclear RibonucleoProtein     | 2            | 4            | Y               |
| <i>rpb5-5001</i>     | YBR154C         | <i>RPB5</i>  | RNA Polymerase B                           | 4            | 4            | Y               |
| <i>rpc17-5001</i>    | YJL011C         | <i>RPC17</i> | RNA Polymerase C                           | 4            | 4            | Y               |
| <i>pol31-5001</i>    | YJR006W         | <i>POL31</i> | POLymerase                                 | 4            | 4            | Y               |
| <i>srp54-5001</i>    | YPR088C         | <i>SRP54</i> | Signal Recognition Particle 54-kD subunit  | 4            | 4            | Y               |
| <i>dbp6-5001</i>     | YNR038W         | <i>DBP6</i>  | Dead Box Protein                           | 4            | 4            | Y               |

|                   |         |              |                           |   |   |   |
|-------------------|---------|--------------|---------------------------|---|---|---|
| <i>dbp9-5001</i>  | YLR276C | <i>DBP9</i>  | Dead Box Protein          | 4 | 4 | Y |
| <i>yef3-f650s</i> | YLR249W | <i>YEF3</i>  | Yeast Elongation Factor   | 2 | 4 | Y |
| <i>cdc5-1</i>     | YMR001C | <i>CDC5</i>  | Cell Division Cycle       | 2 | 4 | Y |
| <i>cdc31-1</i>    | YOR257W | <i>CDC31</i> | Cell Division Cycle       | 2 | 4 | Y |
| <i>hrr25-5001</i> | YPL204W | <i>HRR25</i> | HO and Radiation Repair   | 3 | 4 | Y |
| <i>ost2-5001</i>  | YOR103C | <i>OST2</i>  | OligoSaccharylTransferase | 4 | 4 | Y |

612

613 **TABLE 2.** Summary of the SDL growth phenotypes of mutants that exhibit SDL with *GALCSE4*  
614 and combined with *hhf1Δ* or *hhf2Δ*. Shown is the protein function, relevant strain genotype, and  
615 growth with *GALCSE4*. Wild type growth is indicated as ++; SDL as --- and extent of  
616 suppression (++ or +++).

| Protein Function               | Relevant Strain Genotype  | Growth with <i>GALCSE4</i> |
|--------------------------------|---------------------------|----------------------------|
|                                | WT                        | ++                         |
| Histone H4                     | <i>hhf1Δ</i>              | +++                        |
|                                | <i>hhf2Δ</i>              | +++                        |
| Histone H2A                    | <i>hta1Δ</i>              | ++                         |
|                                | <i>hta2Δ</i>              | ++                         |
| Histone H3                     | <i>hht1Δ</i>              | ++                         |
|                                | <i>hht2Δ</i>              | ++                         |
| E3 Ubiquitin Ligase            | <i>psh1Δ</i>              | ---                        |
|                                | <i>psh1Δ hhf1Δ</i>        | +++                        |
|                                | <i>psh1Δ hhf2Δ</i>        | +++                        |
|                                | <i>psh1Δ hhf1Δ + HHF1</i> | ---                        |
|                                | <i>psh1Δ hhf2Δ + HHF2</i> | ---                        |
|                                | <i>psh1Δ hta1Δ</i>        | ---                        |
|                                | <i>psh1Δ hta2Δ</i>        | ---                        |
|                                | <i>psh1Δ hht1Δ</i>        | ---                        |
|                                | <i>psh1Δ hht2Δ</i>        | ---                        |
| SUMO-Targeted Ubiquitin Ligase | <i>slx5Δ</i>              | --                         |
|                                | <i>slx5Δ hhf1Δ</i>        | +++                        |
|                                | <i>slx5Δ hhf2Δ</i>        | +++                        |
| Ubiquitin Binding              | <i>doa1Δ</i>              | ---                        |
|                                | <i>doa1Δ hhf1Δ</i>        | +++                        |
|                                | <i>doa1Δ hhf2Δ</i>        | +++                        |



|                                |                     |     |
|--------------------------------|---------------------|-----|
| HIR Nucleosome Binding Complex | <i>hir2Δ</i>        | --  |
|                                | <i>hir2Δ hhf1Δ</i>  | -   |
|                                | <i>hir2Δ hhf2Δ</i>  | ++  |
| F-box of the SCF Complex       | <i>cdc4-1</i>       | --  |
|                                | <i>cdc4-1 hhf1Δ</i> | +++ |
|                                | <i>cdc4-1 hhf2Δ</i> | +++ |
| Dbf4-Dependent Kinase          | <i>cdc7-4</i>       | --- |
|                                | <i>cdc7-4 hhf1Δ</i> | ++  |
|                                | <i>cdc7-4 hhf2Δ</i> | ++  |

617

618

619  
620  
621  
622  
623  
624  
625  
626  
627  
628  
629  
630  
631  
632  
633  
634  
635  
636  
637  
638  
639  
640

## CITATIONS

Allshire, R. C., and G. H. Karpen, 2008 Epigenetic regulation of centromeric chromatin: old dogs, new tricks? *Nat Rev Genet* 9: 923-937.

Amato, A., T. Schillaci, L. Lentini and A. Di Leonardo, 2009 CENPA overexpression promotes genome instability in pRb-depleted human cells. *Mol Cancer* 8: 119.

Athwal, R. K., M. P. Walkiewicz, S. Baek, S. Fu, M. Bui *et al.*, 2015 CENP-A nucleosomes localize to transcription factor hotspots and subtelomeric sites in human cancer cells. *Epigenetics Chromatin* 8: 2.

Au, W. C., M. J. Crisp, S. Z. DeLuca, O. J. Rando and M. A. Basrai, 2008 Altered dosage and mislocalization of histone H3 and Cse4p lead to chromosome loss in *Saccharomyces cerevisiae*. *Genetics* 179: 263-275.

Au, W. C., A. R. Dawson, D. W. Rawson, S. B. Taylor, R. E. Baker *et al.*, 2013 A Novel Role of the N-Terminus of Budding Yeast Histone H3 Variant Cse4 in Ubiquitin-Mediated Proteolysis. *Genetics* 194: 513-518.

Au, W. C., T. Zhang, P. K. Mishra, J. R. Eisenstatt, R. L. Walker *et al.*, 2020 Skp, Cullin, F-box (SCF)-Met30 and SCF-Cdc4-Mediated Proteolysis of CENP-A Prevents Mislocalization of CENP-A for Chromosomal Stability in Budding Yeast. *PLoS Genet* 16: e1008597.

Biggins, S., 2013 The Composition, Functions, and Regulation of the Budding Yeast Kinetochore. *Genetics* 194: 817-846.

Boltengagen, M., A. Huang, A. Boltengagen, L. Trixl, H. Lindner *et al.*, 2016 A novel role for the histone acetyltransferase Hat1 in the CENP-A/CID assembly pathway in *Drosophila melanogaster*. *Nucleic Acids Res* 44: 2145-2159.

- 641 Burrack, L. S., and J. Berman, 2012 Flexibility of centromere and kinetochore structures. Trends  
642 Genet 28: 204-212.
- 643 Camahort, R., B. Li, L. Florens, S. K. Swanson, M. P. Washburn *et al.*, 2007 Scm3 is essential to  
644 recruit the histone H3 variant Cse4 to centromeres and to maintain a functional  
645 kinetochore. Mol Cell 26: 853-865.
- 646 Chen, C. C., M. L. Dechassa, E. Bettini, M. B. Ledoux, C. Belisario *et al.*, 2014 CAL1 is the  
647 Drosophila CENP-A assembly factor. J Cell Biol 204: 313-329.
- 648 Cheng, H., X. Bao, X. Gan, S. Luo and H. Rao, 2017 Multiple E3s promote the degradation of  
649 histone H3 variant Cse4. Sci Rep 7: 8565.
- 650 Cheng, H., X. Bao and H. Rao, 2016 The F-box Protein Rcy1 Is Involved in the Degradation of  
651 Histone H3 Variant Cse4 and Genome Maintenance. J Biol Chem 291: 10372-10377.
- 652 Chereji, R. V., J. Ocampo and D. J. Clark, 2017 MNase-Sensitive Complexes in Yeast:  
653 Nucleosomes and Non-histone Barriers. Mol Cell 65: 565-577 e563.
- 654 Choy, J. S., P. K. Mishra, W. C. Au and M. A. Basrai, 2012 Insights into assembly and  
655 regulation of centromeric chromatin in *Saccharomyces cerevisiae*. Biochim Biophys Acta  
656 1819: 776-783.
- 657 Ciftci-Yilmaz, S., W. C. Au, P. K. Mishra, J. R. Eisenstatt, J. Chang *et al.*, 2018 A Genome-  
658 Wide Screen Reveals a Role for the HIR Histone Chaperone Complex in Preventing  
659 Mislocalization of Budding Yeast CENP-A. Genetics 210: 203-218.
- 660 Cole, H. A., J. Ocampo, J. R. Iben, R. V. Chereji and D. J. Clark, 2014 Heavy transcription of  
661 yeast genes correlates with differential loss of histone H2B relative to H4 and queued  
662 RNA polymerases. Nucleic Acids Res 42: 12512-12522.

663 Collins, K. A., S. Furuyama and S. Biggins, 2004 Proteolysis contributes to the exclusive  
664 centromere localization of the yeast Cse4/CENP-A histone H3 variant. *Curr Biol* 14:  
665 1968-1972.

666 Costanzo, M., B. VanderSluis, E. N. Koch, A. Baryshnikova, C. Pons *et al.*, 2016 A global  
667 genetic interaction network maps a wiring diagram of cellular function. *Science* 353.

668 Deyter, G. M., and S. Biggins, 2014 The FACT complex interacts with the E3 ubiquitin ligase  
669 Psh1 to prevent ectopic localization of CENP-A. *Genes Dev* 28: 1815-1826.

670 Deyter, G. M., E. M. Hildebrand, A. D. Barber and S. Biggins, 2017 Histone H4 Facilitates the  
671 Proteolysis of the Budding Yeast CENP-ACse4 Centromeric Histone Variant. *Genetics*  
672 205: 113-124.

673 Eisenstatt, J. R., L. Boeckmann, W. C. Au, V. Garcia, L. Bursch *et al.*, 2020 Dbf4-Dependent  
674 Kinase (DDK)-Mediated Proteolysis of CENP-A Prevents Mislocalization of CENP-A in  
675 *Saccharomyces cerevisiae*. G3 (Bethesda).

676 Foltz, D. R., L. E. Jansen, A. O. Bailey, J. R. Yates, 3rd, E. A. Bassett *et al.*, 2009 Centromere-  
677 specific assembly of CENP-a nucleosomes is mediated by HJURP. *Cell* 137: 472-484.

678 Fujita, Y., T. Hayashi, T. Kiyomitsu, Y. Toyoda, A. Kokubu *et al.*, 2007 Priming of centromere  
679 for CENP-A recruitment by human hMis18alpha, hMis18beta, and M18BP1. *Dev Cell*  
680 12: 17-30.

681 Glowczewski, L., P. Yang, T. Kalashnikova, M. S. Santisteban and M. M. Smith, 2000 Histone-  
682 histone interactions and centromere function. *Mol Cell Biol* 20: 5700-5711.

683 Heun, P., S. Erhardt, M. D. Blower, S. Weiss, A. D. Skora *et al.*, 2006 Mislocalization of the  
684 *Drosophila* centromere-specific histone CID promotes formation of functional ectopic  
685 kinetochores. *Dev Cell* 10: 303-315.

- 686 Hewawasam, G., M. Shivaraju, M. Mattingly, S. Venkatesh, S. Martin-Brown *et al.*, 2010 Psh1  
687 is an E3 ubiquitin ligase that targets the centromeric histone variant Cse4. *Mol Cell* 40:  
688 444-454.
- 689 Hewawasam, G. S., K. Dhatchinamoorthy, M. Mattingly, C. Seidel and J. L. Gerton, 2018  
690 Chromatin assembly factor-1 (CAF-1) chaperone regulates Cse4 deposition into  
691 chromatin in budding yeast. *Nucleic Acids Res* 46: 4440-4455.
- 692 Hewawasam, G. S., M. Mattingly, S. Venkatesh, Y. Zhang, L. Florens *et al.*, 2014  
693 Phosphorylation by casein kinase 2 facilitates Psh1 protein-assisted degradation of Cse4  
694 protein. *J Biol Chem* 289: 29297-29309.
- 695 Hildebrand, E. M., and S. Biggins, 2016 Regulation of Budding Yeast CENP-A levels Prevents  
696 Misincorporation at Promoter Nucleosomes and Transcriptional Defects. *PLoS Genet* 12:  
697 e1005930.
- 698 Kastenmayer, J. P., L. Ni, A. Chu, L. E. Kitchen, W. C. Au *et al.*, 2006 Functional genomics of  
699 genes with small open reading frames (sORFs) in *S. cerevisiae*. *Genome Res* 16: 365-  
700 373.
- 701 Kitagawa, K., and P. Hieter, 2001 Evolutionary conservation between budding yeast and human  
702 kinetochores. *Nature Reviews Molecular Cellular Biology* 2: 678-687.
- 703 Lacoste, N., A. Woolfe, H. Tachiwana, A. V. Garea, T. Barth *et al.*, 2014 Mislocalization of the  
704 centromeric histone variant CenH3/CENP-A in human cells depends on the chaperone  
705 DAXX. *Mol Cell* 53: 631-644.
- 706 Li, Y., Z. Zhu, S. Zhang, D. Yu, H. Yu *et al.*, 2011 ShRNA-targeted centromere protein A  
707 inhibits hepatocellular carcinoma growth. *PLoS One* 6: e17794.

- 708 Maddox, P. S., K. D. Corbett and A. Desai, 2012 Structure, assembly and reading of centromeric  
709 chromatin. *Curr Opin Genet Dev* 22: 139-147.
- 710 McGovern, S. L., Y. Qi, L. Pusztai, W. F. Symmans and T. A. Buchholz, 2012 Centromere  
711 protein-A, an essential centromere protein, is a prognostic marker for relapse in estrogen  
712 receptor-positive breast cancer. *Breast Cancer Res* 14: R72.
- 713 McKinley, K. L., and I. M. Cheeseman, 2016 The molecular basis for centromere identity and  
714 function. *Nat Rev Mol Cell Biol* 17: 16-29.
- 715 Mishra, P. K., W. C. Au, J. S. Choy, P. H. Kuich, R. E. Baker *et al.*, 2011 Misregulation of  
716 Scm3p/HJURP causes chromosome instability in *Saccharomyces cerevisiae* and human  
717 cells. *PLoS Genet* 7: e1002303.
- 718 Mizuguchi, G., H. Xiao, J. Wisniewski, M. M. Smith and C. Wu, 2007 Nonhistone Scm3 and  
719 histones CenH3-H4 assemble the core of centromere-specific nucleosomes. *Cell* 129:  
720 1153-1164.
- 721 Moreno-Moreno, O., M. Torras-Llort and F. Azorin, 2006 Proteolysis restricts localization of  
722 CID, the centromere-specific histone H3 variant of *Drosophila*, to centromeres. *Nucleic*  
723 *Acids Res* 34: 6247-6255.
- 724 Ohkuni, K., R. Abdulle and K. Kitagawa, 2014 Degradation of centromeric histone H3 variant  
725 Cse4 requires the Fpr3 peptidyl-prolyl Cis-Trans isomerase. *Genetics* 196: 1041-1045.
- 726 Ohkuni, K., E. Suva, W. C. Au, R. L. Walker, R. Levy-Myers *et al.*, 2020 Deposition of  
727 Centromeric Histone H3 Variant CENP-A/Cse4 into Chromatin Is Facilitated by Its C-  
728 Terminal Sumoylation. *Genetics* 214: 839-854.

- 729 Ohkuni, K., Y. Takahashi, A. Fulp, J. Lawrimore, W. C. Au *et al.*, 2016 SUMO-Targeted  
730 Ubiquitin Ligase (STUbL) Slx5 regulates proteolysis of centromeric histone H3 variant  
731 Cse4 and prevents its mislocalization to euchromatin. *Mol Biol Cell*.
- 732 Pidoux, A. L., E. S. Choi, J. K. Abbott, X. Liu, A. Kagansky *et al.*, 2009 Fission yeast Scm3: A  
733 CENP-A receptor required for integrity of subkinetochore chromatin. *Mol Cell* 33: 299-  
734 311.
- 735 Poch, O., and B. Winsor, 1997 Who's Who among the *Saccharomyces cerevisiae* Actin-Related  
736 Proteins? A Classification and Nomenclature Proposal for a Large Family. *Yeast* 13:  
737 1053-1058.
- 738 Ranjitkar, P., M. O. Press, X. Yi, R. Baker, M. J. MacCoss *et al.*, 2010 An E3 ubiquitin ligase  
739 prevents ectopic localization of the centromeric histone H3 variant via the centromere  
740 targeting domain. *Mol Cell* 40: 455-464.
- 741 Shen, X., G. Mizuguchi, A. Hamiche and C. Wu, 2000 A chromatin remodelling complex  
742 involved in transcription and DNA processing. *Nature* 406: 541-544.
- 743 Shen, X., R. Ranallo, E. Choi and C. Wu, 2003 Involvement of Actin-Related Proteins in ATP-  
744 Dependent Chromatin Remodeling. *Mol Cell* 12: 147-155.
- 745 Shrestha, R. L., G. S. Ahn, M. I. Staples, K. M. Sathyan, T. S. Karpova *et al.*, 2017  
746 Mislocalization of centromeric histone H3 variant CENP-A contributes to chromosomal  
747 instability (CIN) in human cells. *Oncotarget* 8: 46781-46800.
- 748 Shuaib, M., K. Ouararhni, S. Dimitrov and A. Hamiche, 2010 HJURP binds CENP-A via a  
749 highly conserved N-terminal domain and mediates its deposition at centromeres. *Proc*  
750 *Natl Acad Sci U S A* 107: 1349-1354.

751 Smith, M. M., H. Yang, M. S. Santisteban, P. W. Boone, A. T. Goldstein *et al.*, 1996 A Novel  
752 Histone H4 Mutant Defective in Nuclear Division  
753 and Mitotic Chromosome Transmission. *Mol Cell Biol* 16: 1017-1026.

754 Stoler, S., K. Rogers, S. Weitze, L. Morey, M. Fitzgerald-Hayes *et al.*, 2007 Scm3, an essential  
755 *Saccharomyces cerevisiae* centromere protein required for G2/M progression and Cse4  
756 localization. *Proc Natl Acad Sci U S A* 104: 10571-10576.

757 Sun, X., P. L. Clermont, W. Jiao, C. D. Helgason, P. W. Gout *et al.*, 2016 Elevated expression of  
758 the centromere protein-A(CENP-A)-encoding gene as a prognostic and predictive  
759 biomarker in human cancers. *Int J Cancer* 139: 899-907.

760 Tomonaga, T., K. Matsushita, S. Yamaguchi, T. Oohashi, H. Shimada *et al.*, 2003  
761 Overexpression and mistargeting of centromere protein-A in human primary colorectal  
762 cancer. *Cancer Res* 63: 3511-3516.

763 Tosi, A., C. Haas, F. Herzog, A. Gilmozzi, O. Berninghausen *et al.*, 2013 Structure and Subunit  
764 Topology of the INO80 Chromatin Remodeler and Its Nucleosome Complex. *Cell* 154:  
765 1207-1219.

766 Verdaasdonk, J. S., and K. Bloom, 2011 Centromeres: unique chromatin structures that drive  
767 chromosome segregation. *Nat Rev Mol Cell Biol* 12: 320-332.

768 Williams, J. S., T. Hayashi, M. Yanagida and P. Russell, 2009 Fission yeast Scm3 mediates  
769 stable assembly of Cnp1/CENP-A into centromeric chromatin. *Mol Cell* 33: 287-298.

770 Zhang, W., J. H. Mao, W. Zhu, A. K. Jain, K. Liu *et al.*, 2016 Centromere and kinetochore gene  
771 misexpression predicts cancer patient survival and response to radiotherapy and  
772 chemotherapy. *Nat Commun* 7: 12619.

773



**A**

*GALCSE4 psh1Δ* x Deletion/TS Array

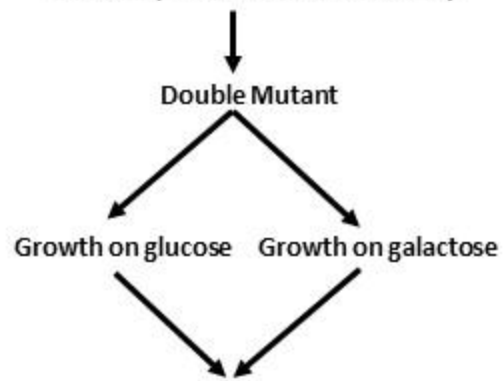

Normalize growth on galactose plate to growth on glucose plate Score for mutants that suppress growth defect of *GALCSE4 psh1Δ*

92 suppressors

38 candidates

Confirm SDL phenotype

**B**

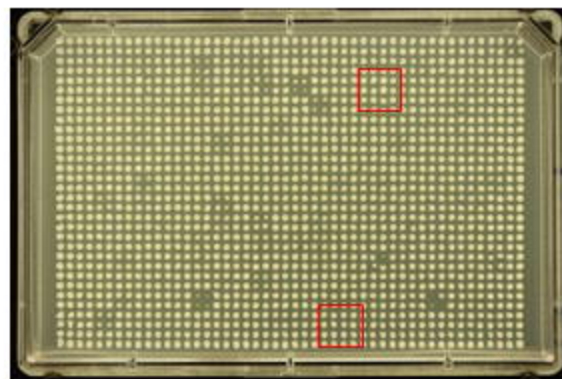

Galactose

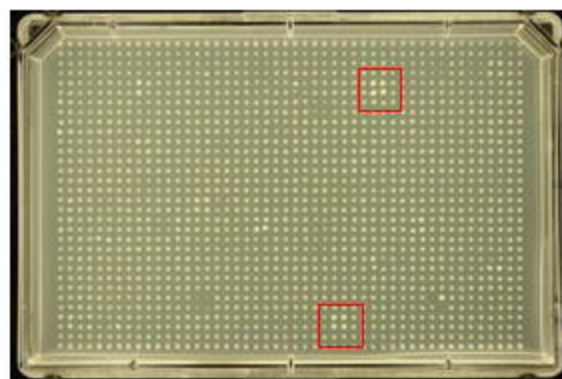

**Figure 1**

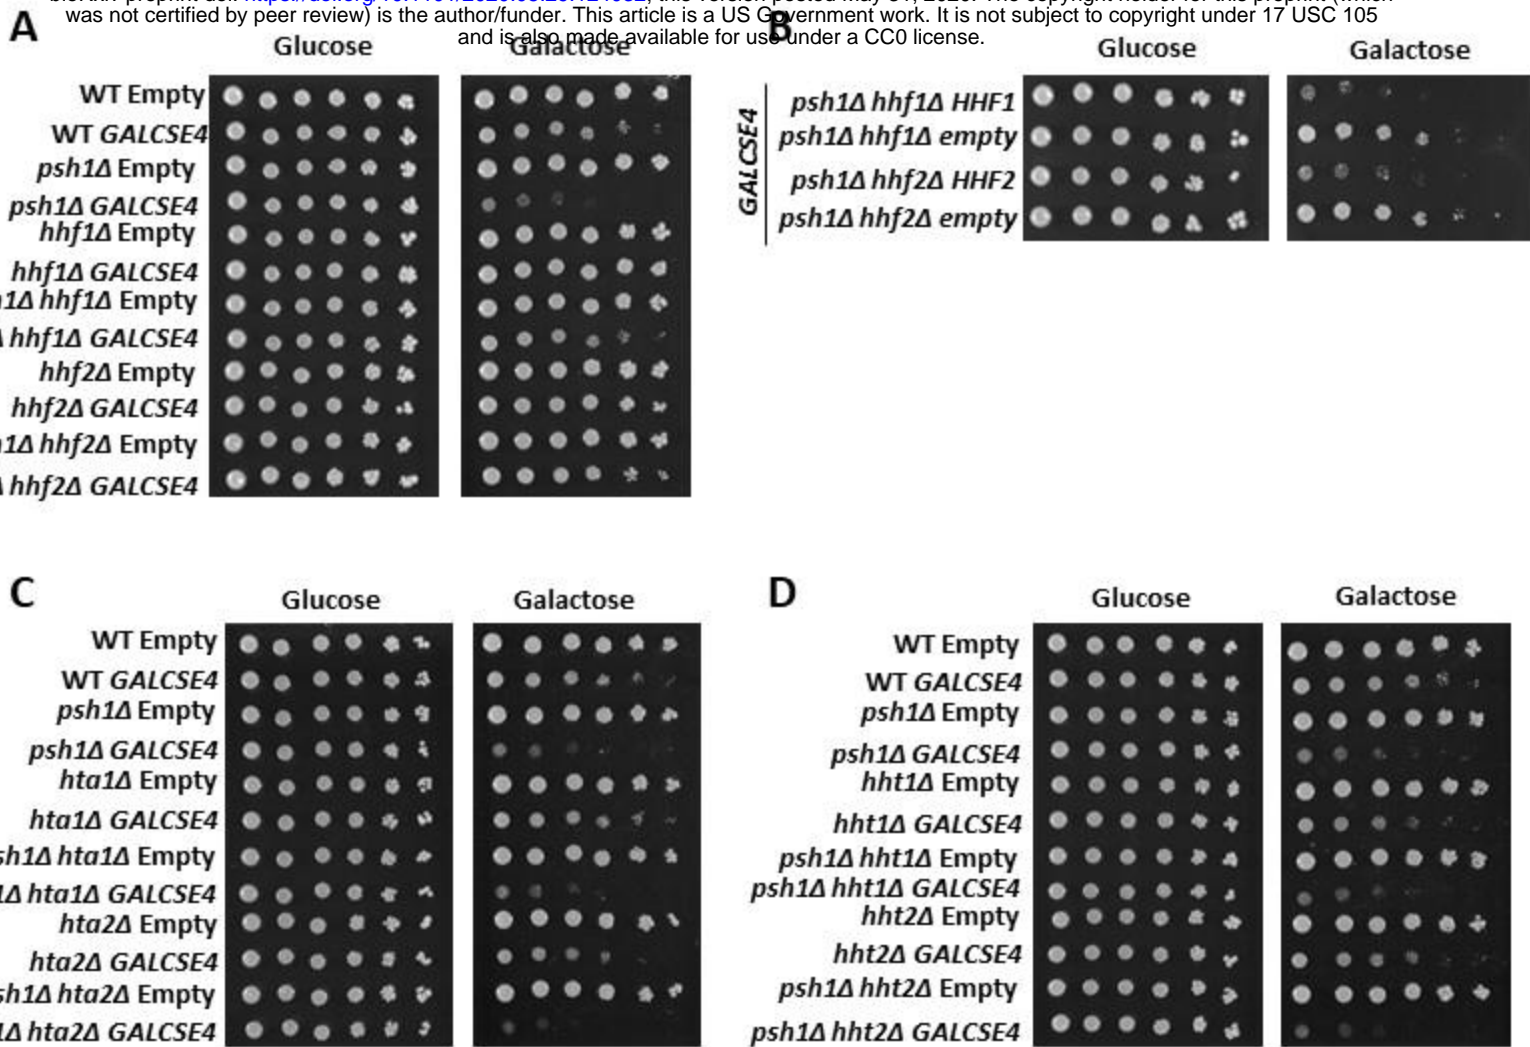

Figure 2

**A**

Glucose

Galactose

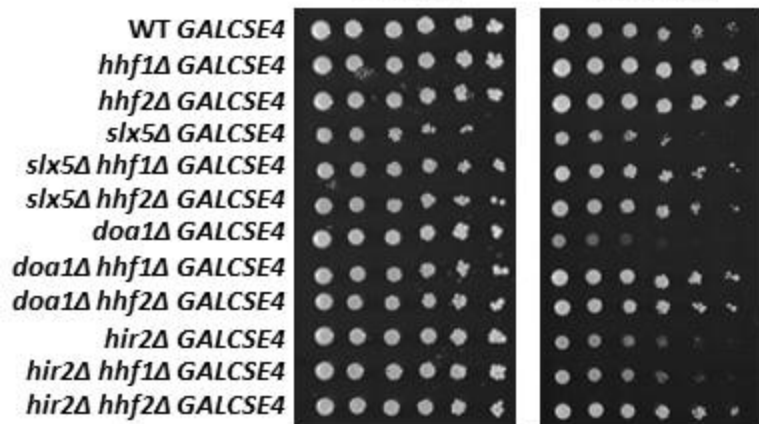

**B**

Glucose

Galactose

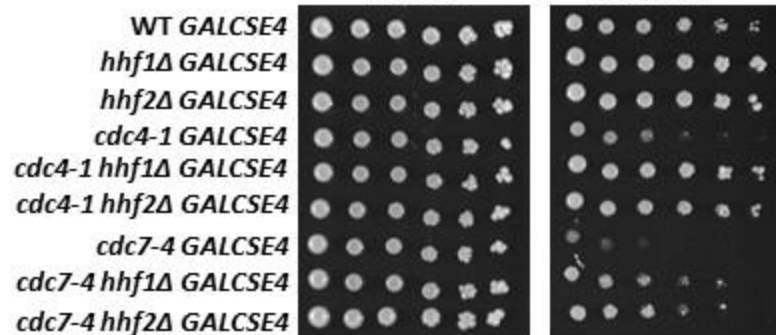

**Figure 3**

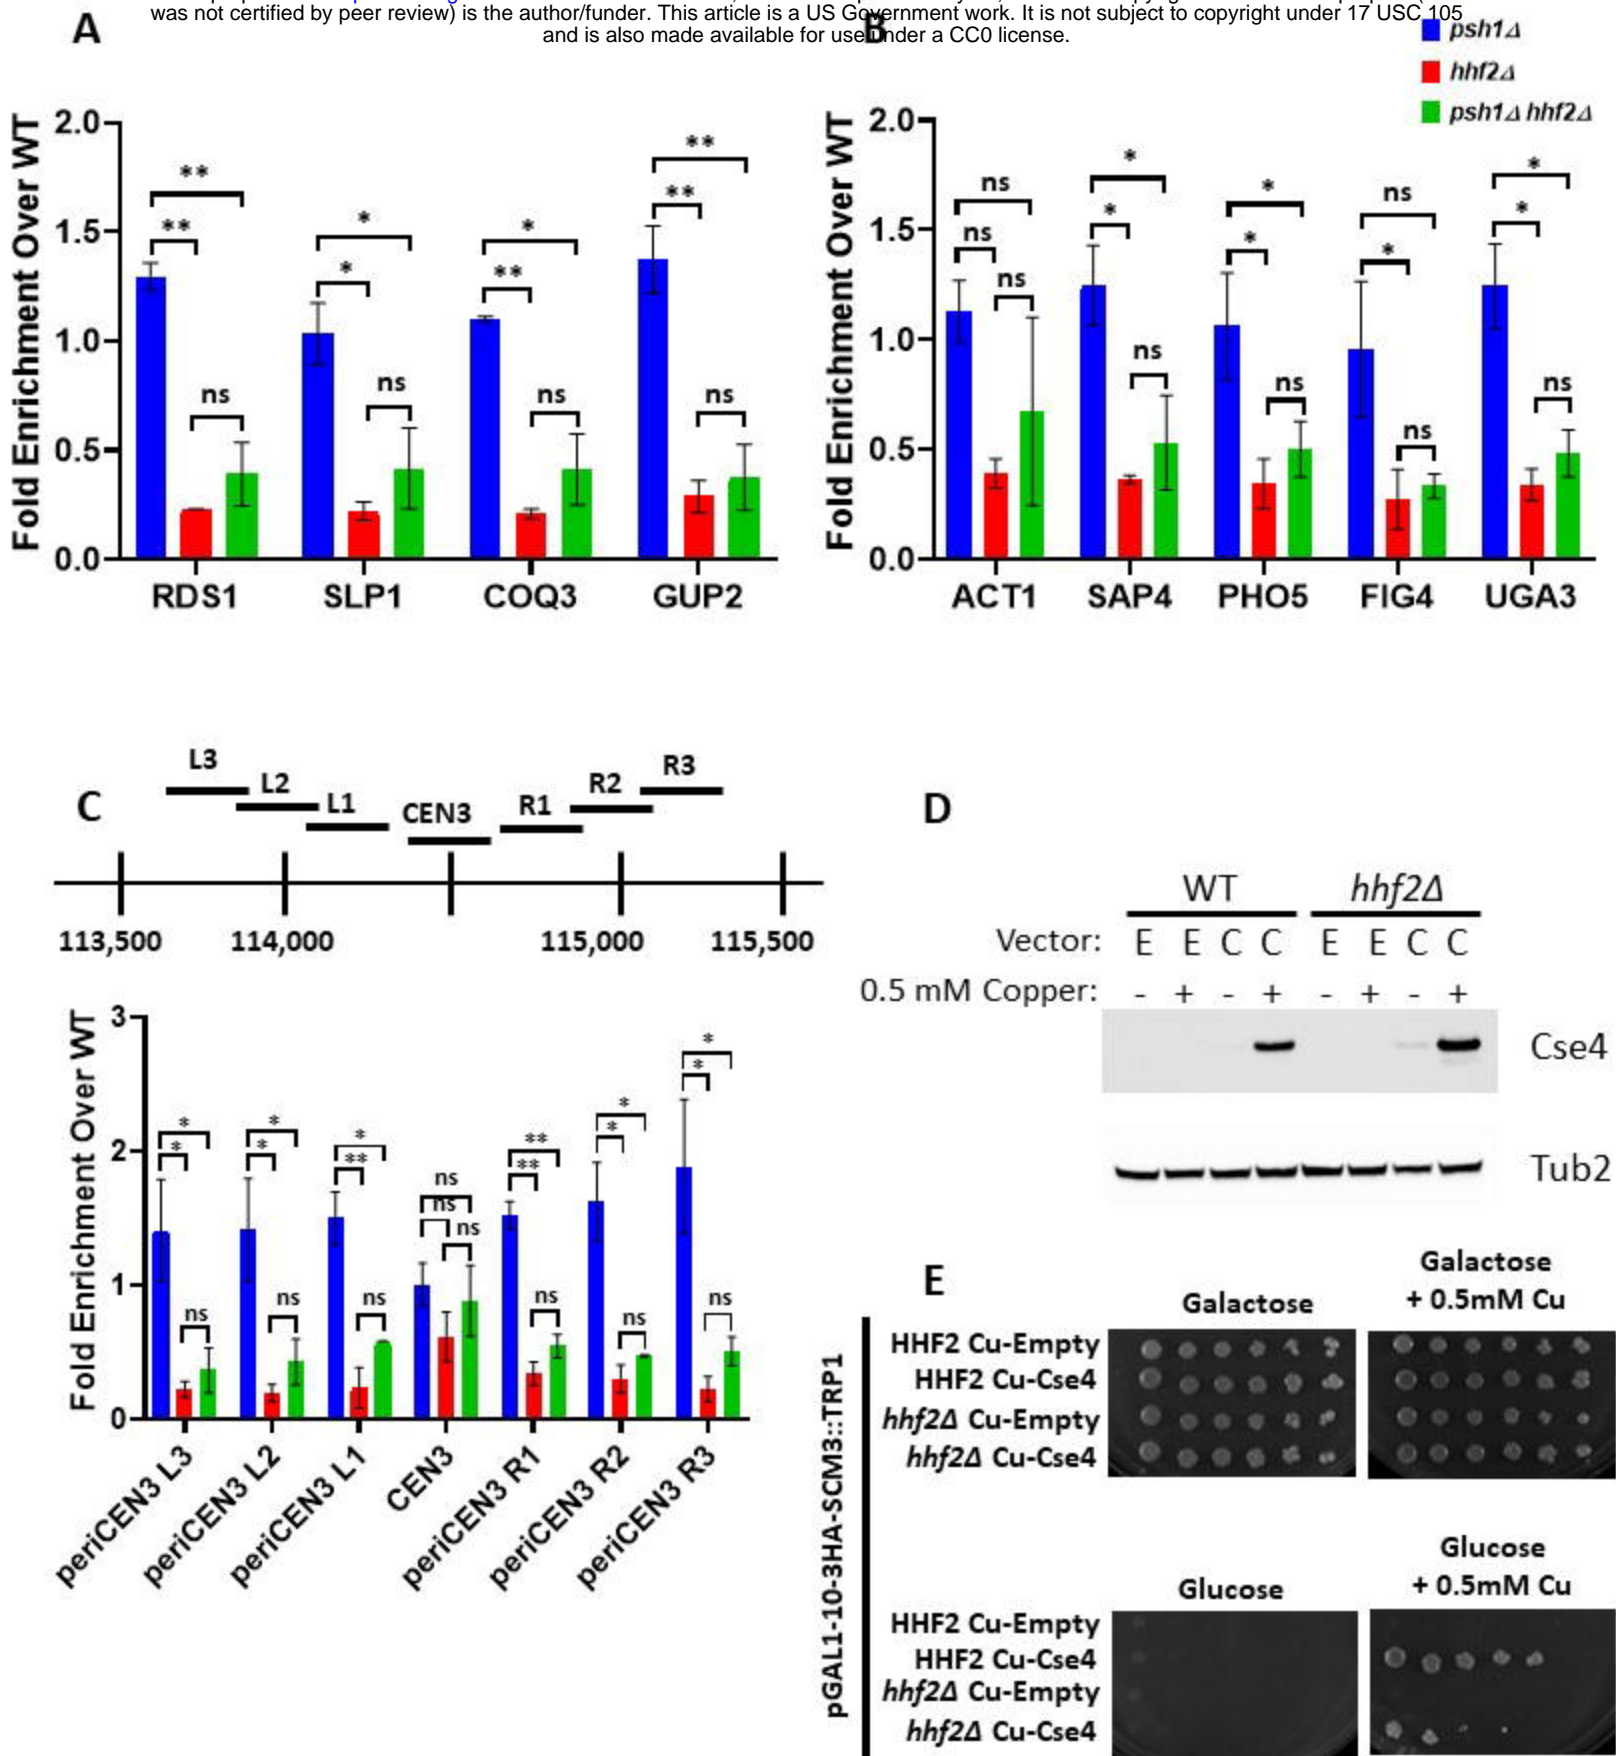

Figure 4

**A**

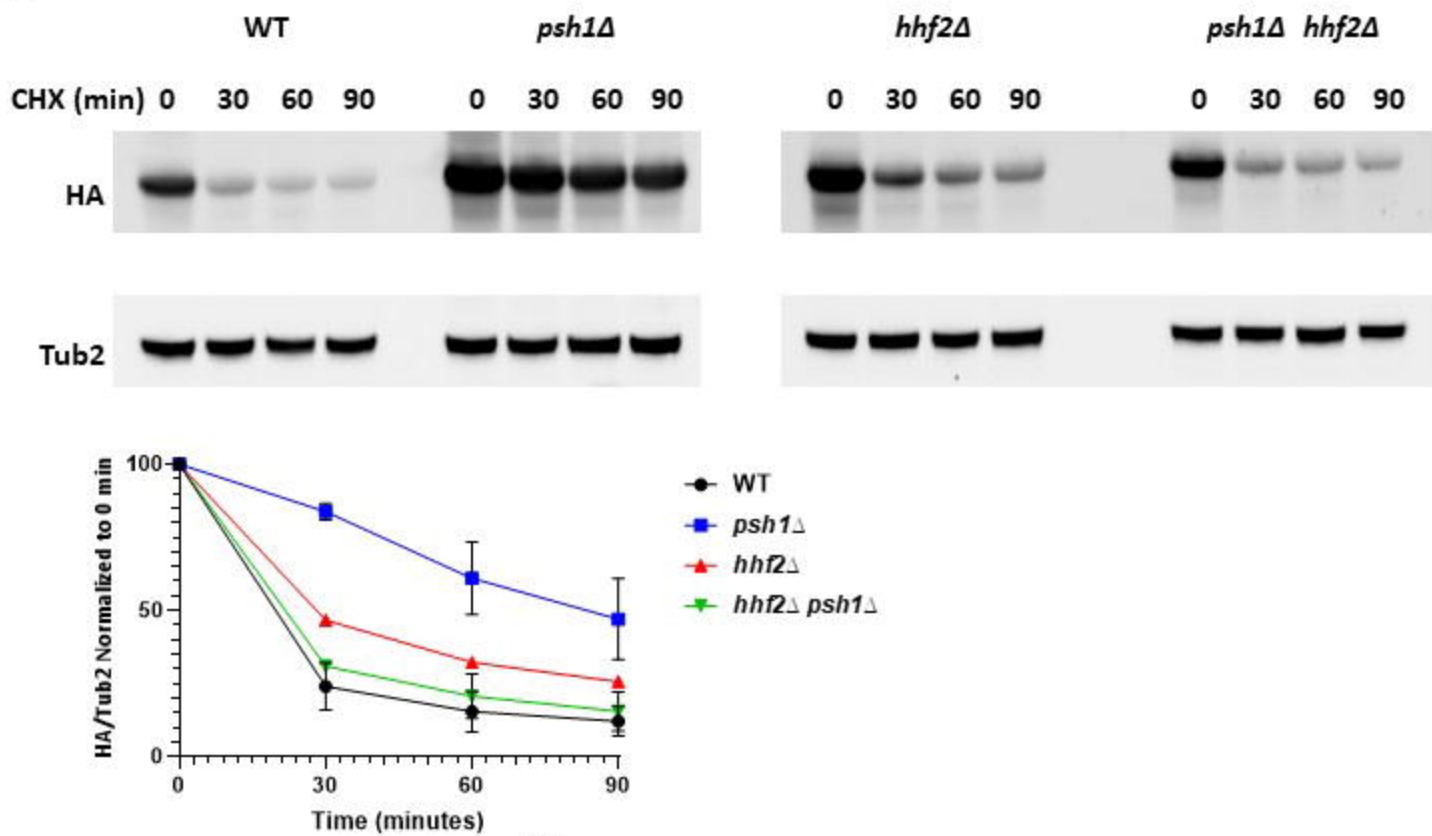

**B**

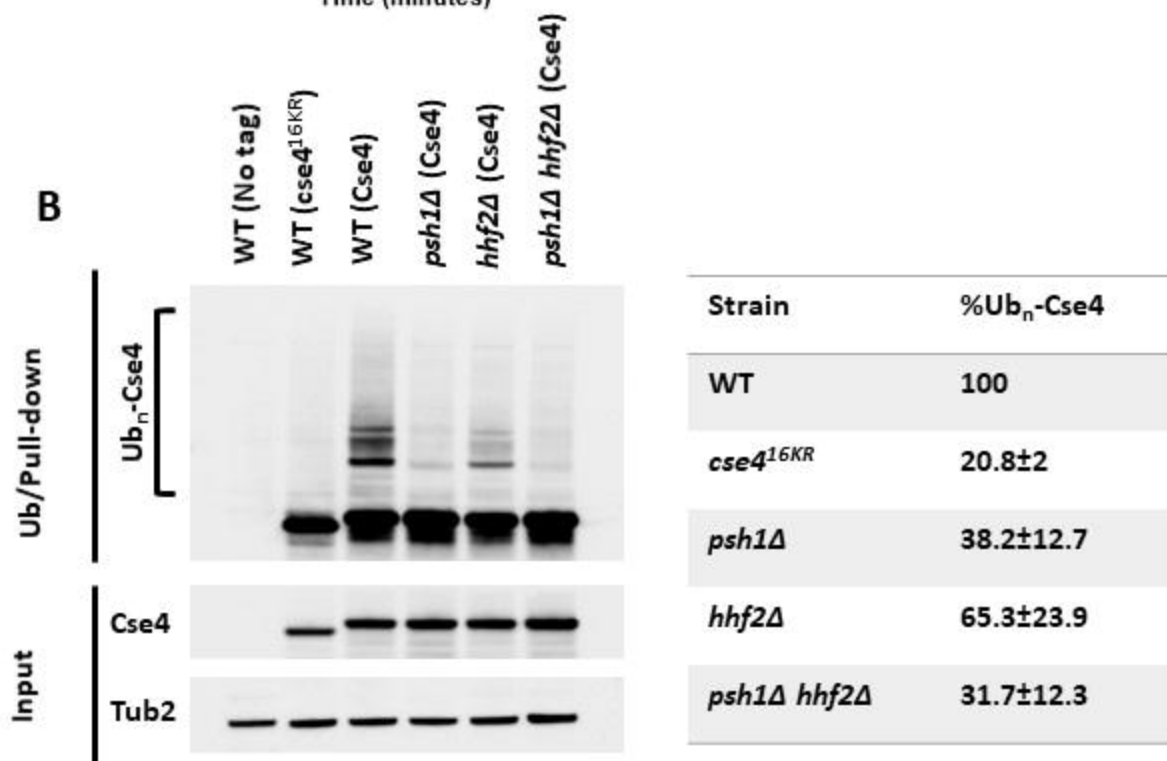

**Figure 5**

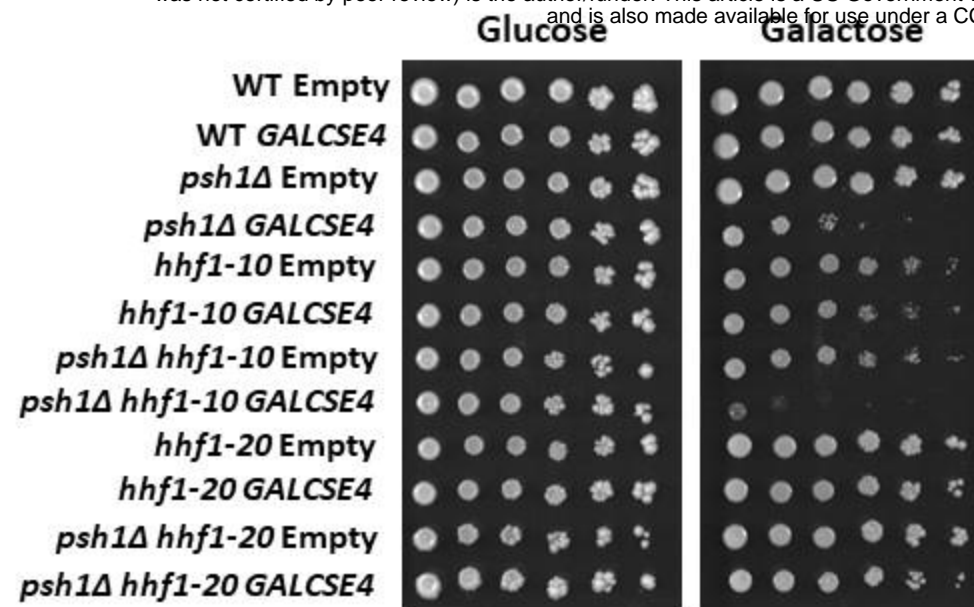

**Figure 6**
